# Supplementary material for: Fluorophore unit controlled photoswitching of hydrazone derivatives: reversible and irreversible off–on/dual-color fluorescence photoswitches
Source: Royal Society of Chemistry journal article supplement (doi:10.1039/d3me00093a), 2023-01-01
Supplement: d3me00093a1.pdf [file d3me00093a1.pdf]

## Electronic Supplementary Information (ESI)

### **Fluorophore unit controlled photoswitching of hydrazone derivatives: Reversible and irreversible off-on/dual-colour fluorescence photoswitches**

Deepanjaly K. Sivadas,<sup>a</sup> Sasikala Ravi,<sup>b</sup> Palaniyappan Nagarasu,<sup>a</sup> Delna Johnson,<sup>c</sup> Vijay Thiruvengadam,<sup>c</sup> Savarimuthu Philip Anthony<sup>b\*</sup> and Vedichi Madhu<sup>a\*</sup>

<sup>a</sup>*Department of Applied Chemistry, Karunya Institute of Technology and Sciences, Coimbatore-641 114, Tamil Nadu, India. Tel: +91-422-261-4483;*

*E-mail: [madhu@karunya.edu](mailto:madhu@karunya.edu); [vmadhu1@gmail.com](mailto:vmadhu1@gmail.com)*

<sup>b</sup>*School of Chemical & Biotechnology, SASTRA Deemed University, Thanjavur- 613401, Tamil Nadu, India. [philip@biotech.sastra.edu](mailto:philip@biotech.sastra.edu)*

<sup>c</sup>*Discipline of Biological Engineering, Indian Institute of Technology Gandhinagar, Gandhinagar, Gujarat, 382355, India*

| <b>S.No.</b> | <b>Content</b>                               | <b>Page No.</b> |
|--------------|----------------------------------------------|-----------------|
| 1.           | Materials and Methods                        | 3               |
| 2.           | Experimental Section                         | 4               |
| 3.           | FT-IR Analysis                               | 6               |
| 4.           | NMR Analysis                                 | 9               |
| 5.           | Mass Analysis                                | 15              |
| 6.           | Single crystal X-ray crystallography studies | 17              |
| 7.           | Aggregation-induced emission (AIE) studies   | 20              |
| 8.           | Photophysical studies                        | 22              |

## 1. Materials and Methods

All solvents and chemicals were purchased from commercial suppliers (Aldrich, Alfa Aesar, Merck and HiMedia) and were used as received. Solvents were purified using appropriate drying agents when necessary. Air and moisture sensitive reactions were carried out under N<sub>2</sub> atmosphere. Fourier transformed infrared (FT-IR) measurements were carried out with Shimadzu IR Affinity-1S spectrophotometer with KBr pellets. <sup>1</sup>H and <sup>13</sup>C NMR spectra were recorded on Bruker Avance III 400 MHz spectrometer equipped with a 5 mm BBFO probe. The UV–Vis absorption spectra were recorded with UV-Vis-NIR spectrophotometer (Jasco V-770) with BaSO<sub>4</sub> as reference, equipped with a diffuse reflectance accessory. Fluorescence spectra and absolute quantum yield for all compounds in the solid state were recorded using Jasco fluorescence spectrometer-FP-8300 instruments equipped with integrating sphere and calibrated light source. Mass spectra were recorded on Micromass ESI-Q-TOF mass spectrometer. Single crystal X-ray diffraction data were collected on a Bruker AXS SMART APEX CCD diffractometer using graphite monochromated MoK $\alpha$  ( $\lambda$ = 0.7107 Å) radiation at 290(2) K and the intensities were measured using  $\omega$  scan with a scan width of 0.3°. A total of 606 frames per set were collected in different settings of  $\phi$  keeping the sample to detector distance of 6.054 cm. Crystal data were reduced by SAINTPLUS, and an empirical absorption correction was applied using the package SADABS available in the Bruker software package. All the crystal structures were solved by direct methods using SHELXS-97<sup>1</sup> and refined by full-matrix least squares method using SHELXL-97<sup>2</sup> present in the program suite WinGX (Version 1.7.0).

## 2. Experimental Section

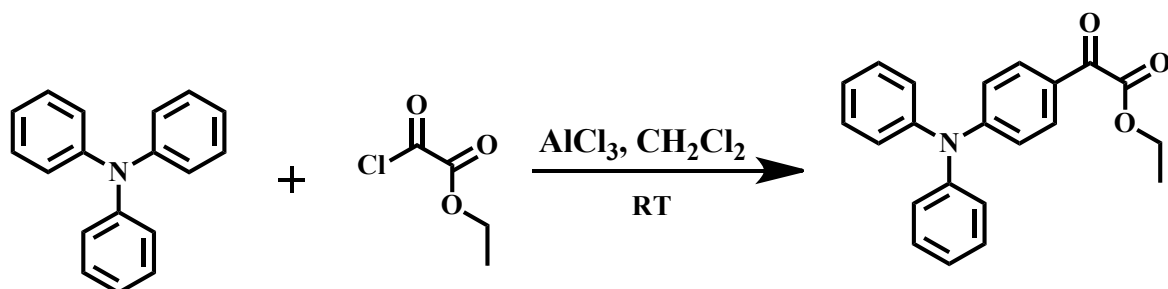

**Scheme S1.** Synthesis of 1.

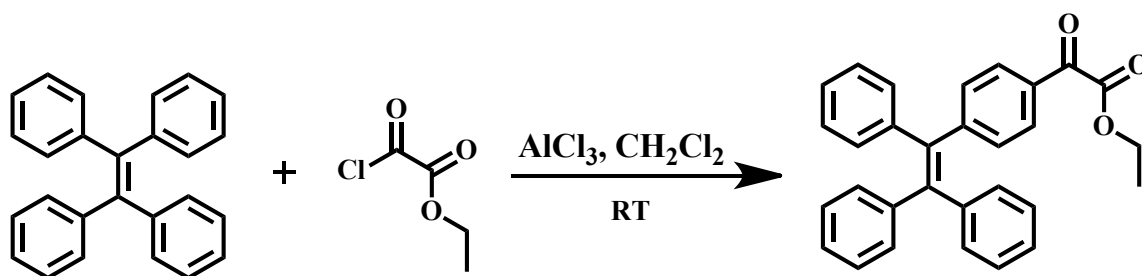

**Scheme S2.** Synthesis of 2.

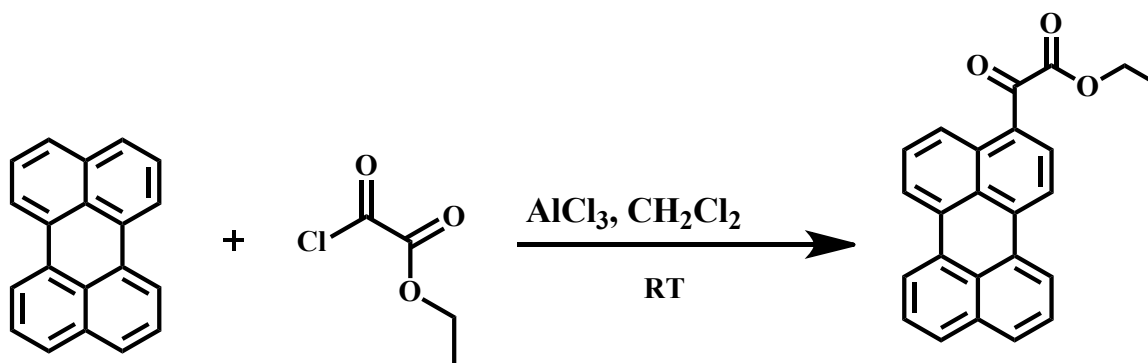

**Scheme S3.** Synthesis of 3.

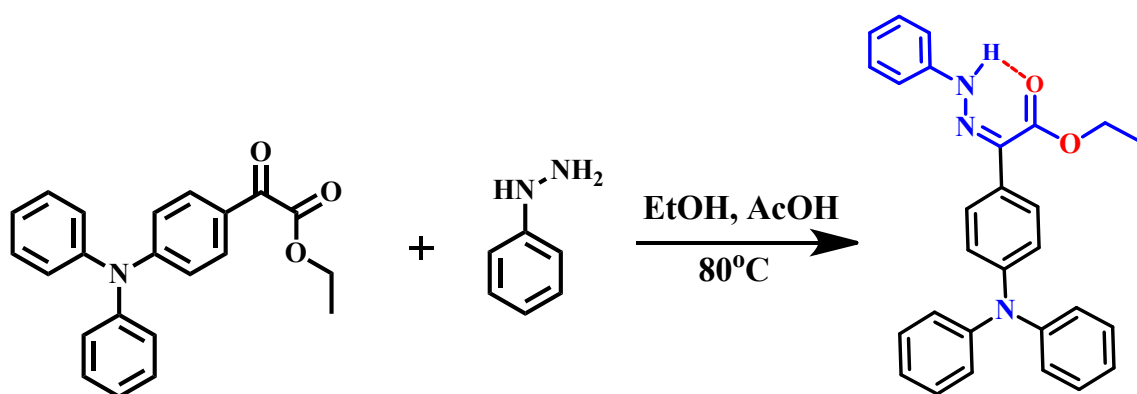

**Scheme S4.** Synthesis of TPA-PH.

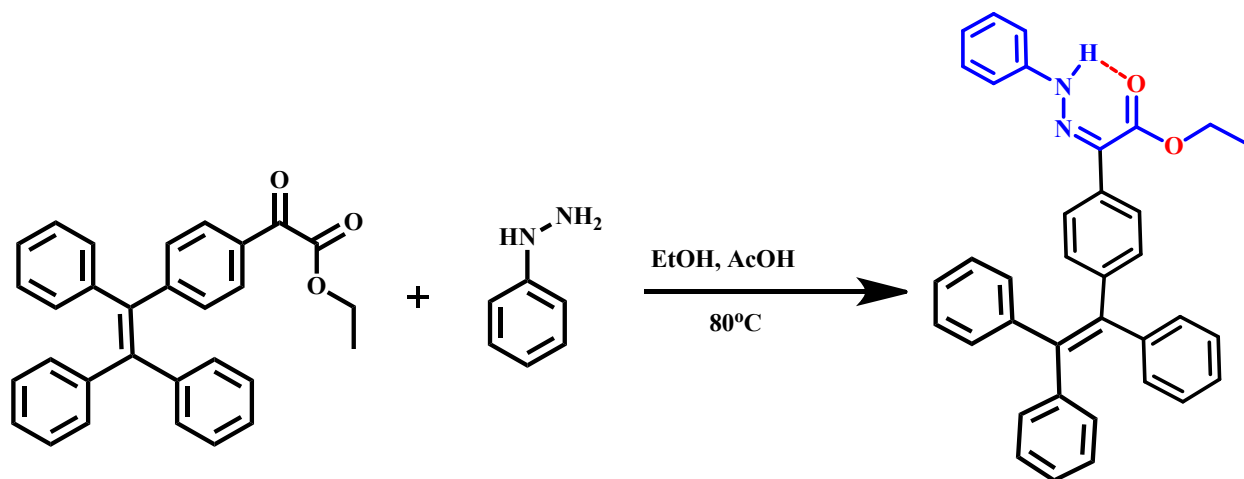

**Scheme S5.** Synthesis of TPE-PH.

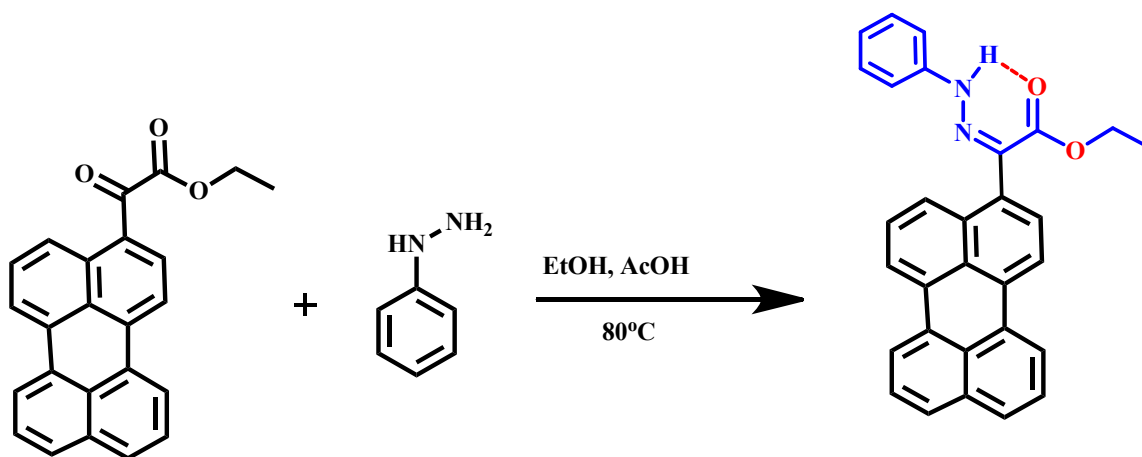

**Scheme S6.** Synthesis of PY-PH.

### 3. FT-IR Analysis

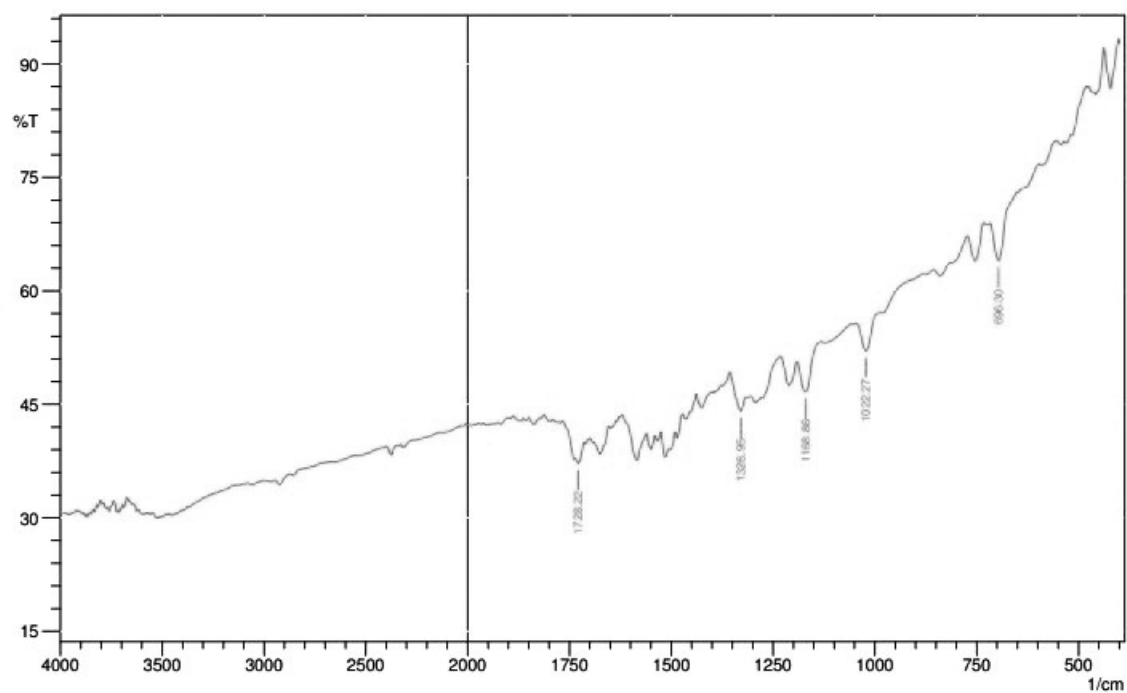

**Fig. S1** FT-IR spectrum of 1.

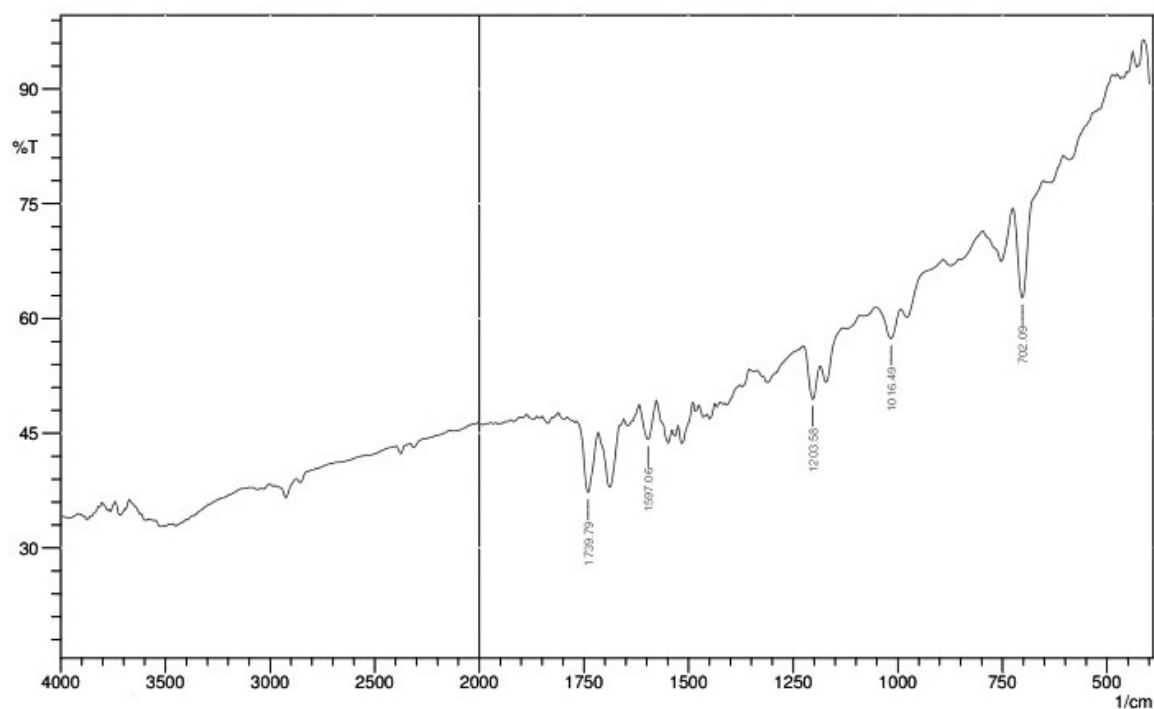

**Fig. S2** FT-IR spectrum of 2.

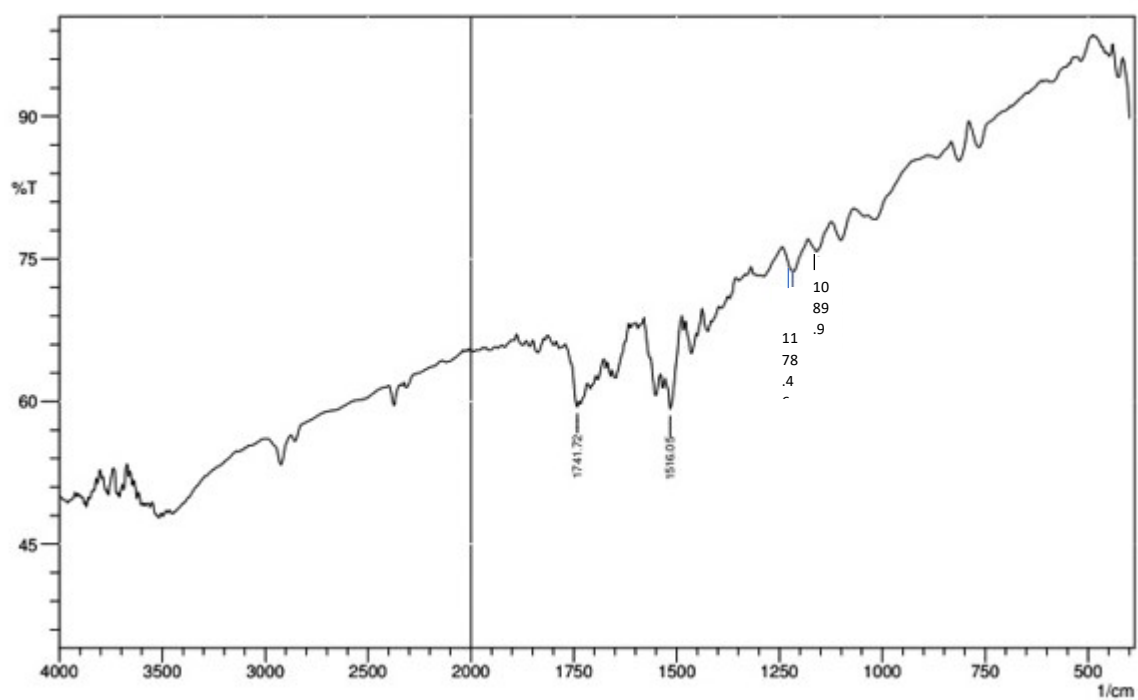

**Fig. S3** FT-IR spectrum of 3.

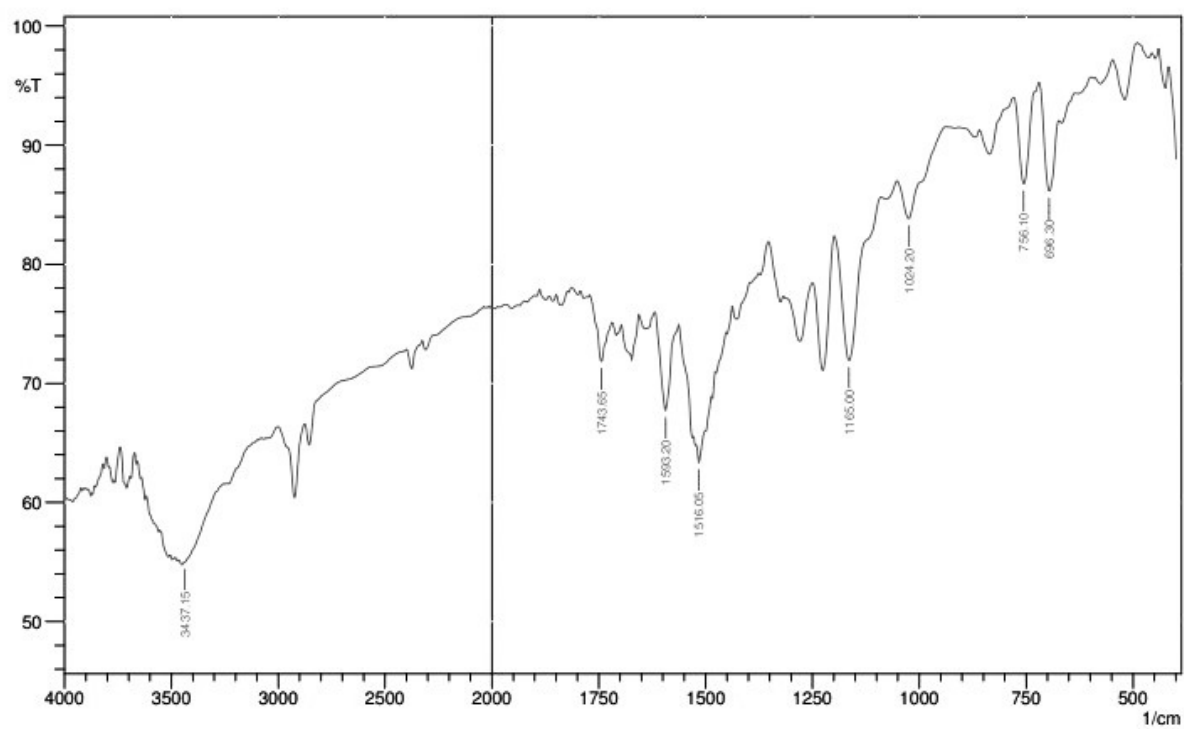

**Fig. S4** FT-IR spectrum of TPA-PH.

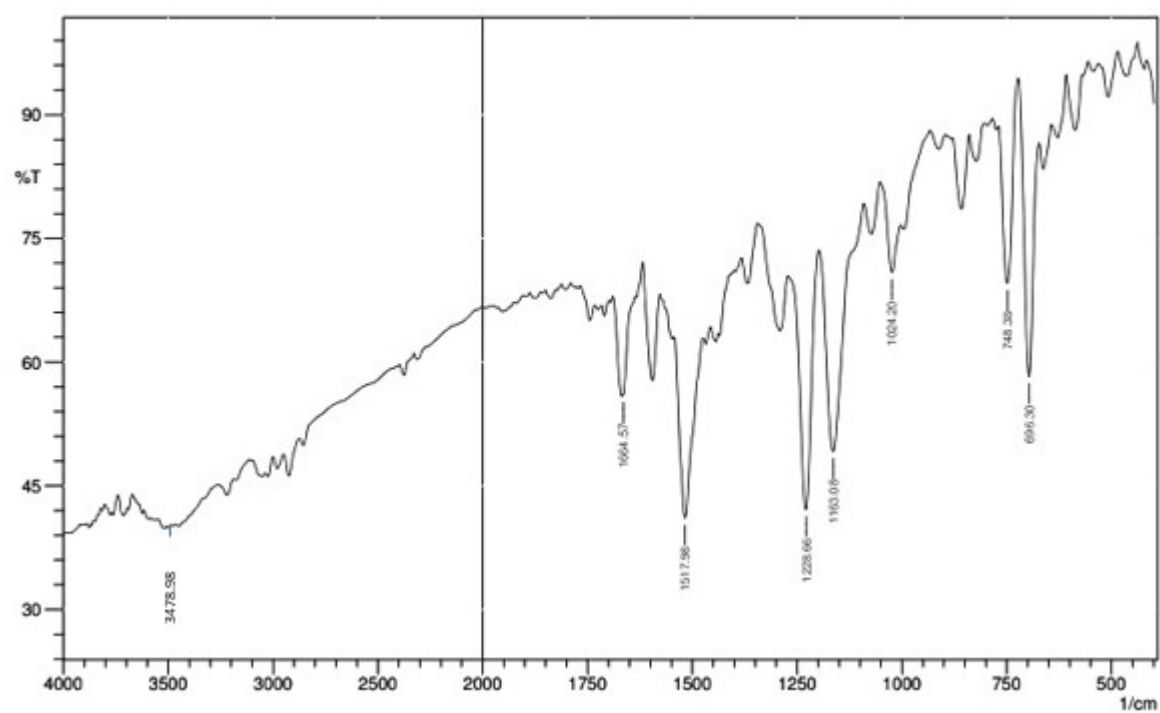

**Fig. S5** FT-IR spectrum of TPE-PH.

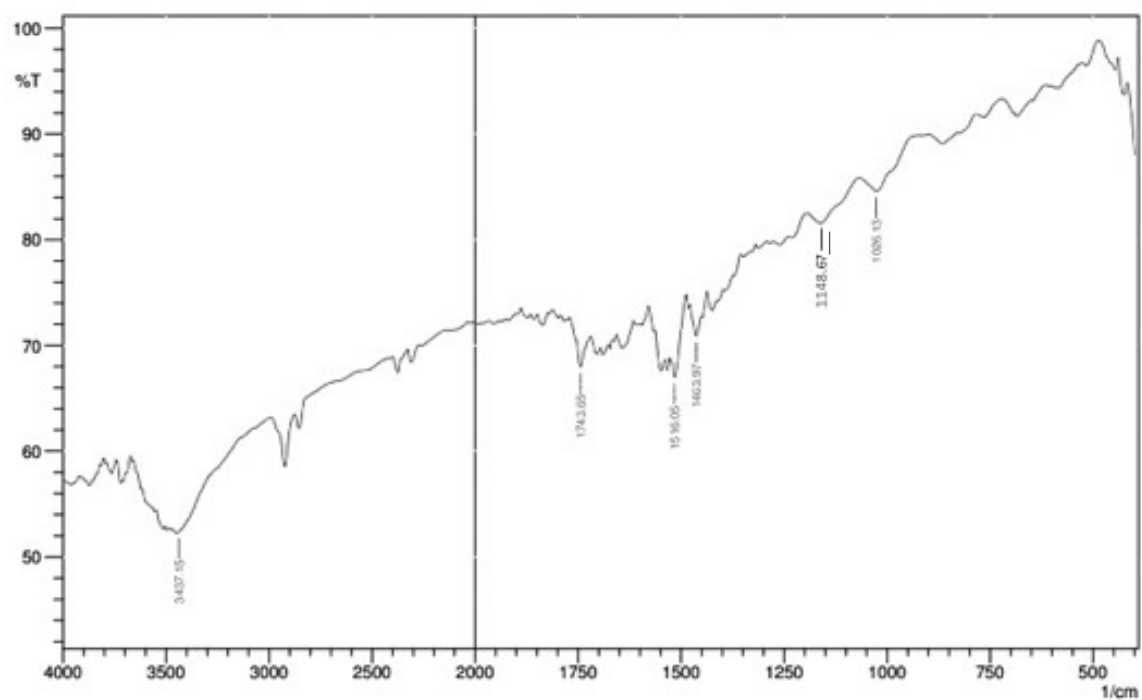

**Fig. S6** FT-IR spectrum of PY-PH.



#### 4. NMR Analysis

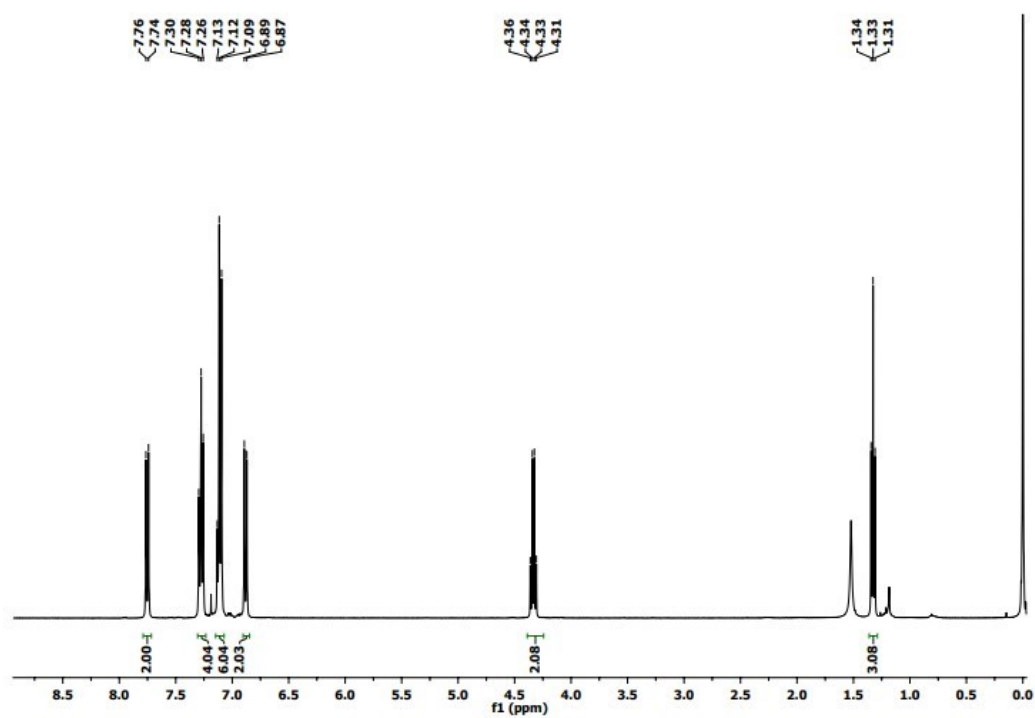

Fig. S7 <sup>1</sup>H NMR spectrum of 1.

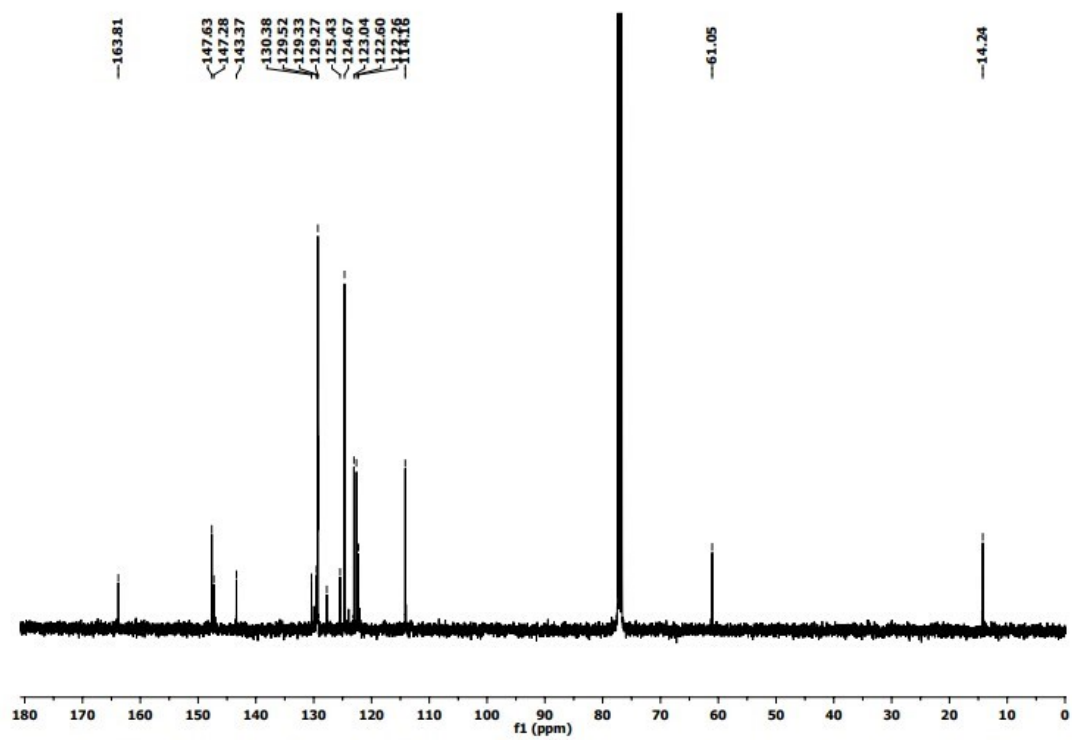

Fig. S8 <sup>13</sup>C NMR spectrum of 1.

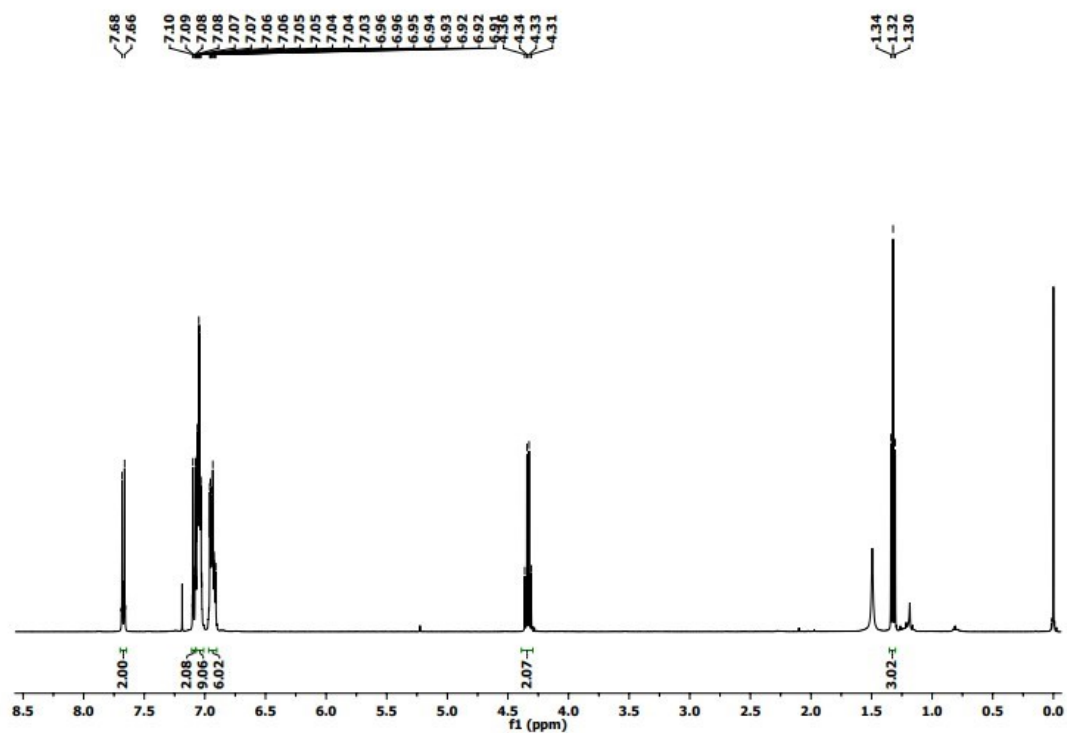

Fig. S9  $^1\text{H}$  NMR spectrum of 2.

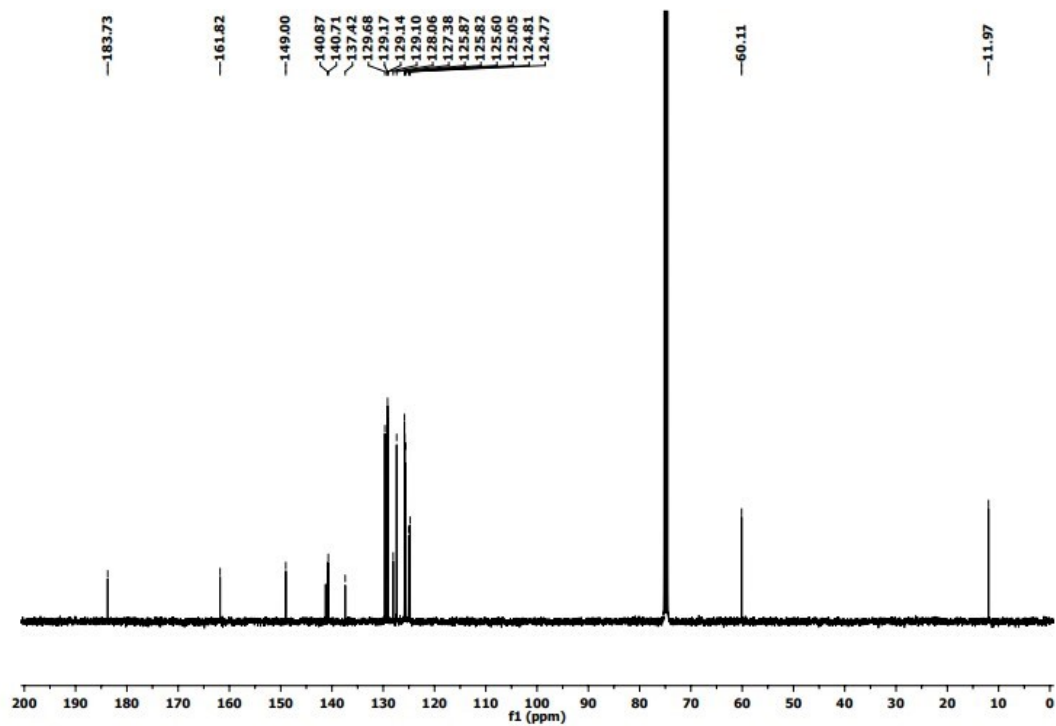

Fig. S10  $^{13}\text{C}$  NMR spectrum of 2.

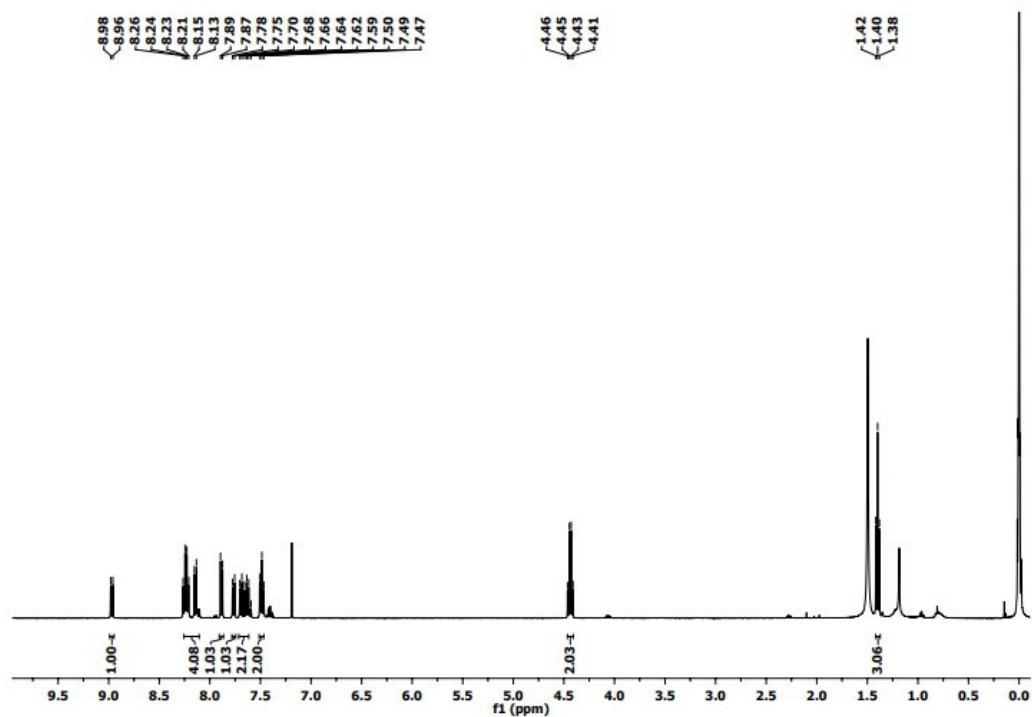

Fig. S11 <sup>1</sup>H NMR spectrum of 3.

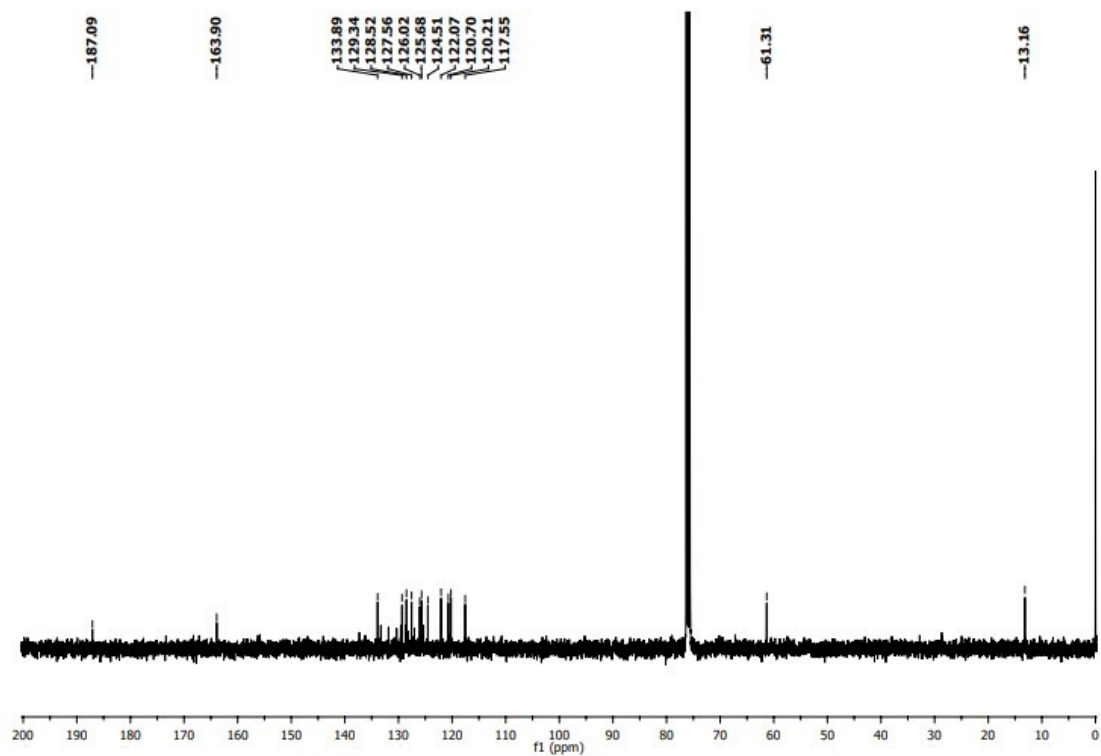

Fig. S12 <sup>13</sup>C NMR spectrum of 3.

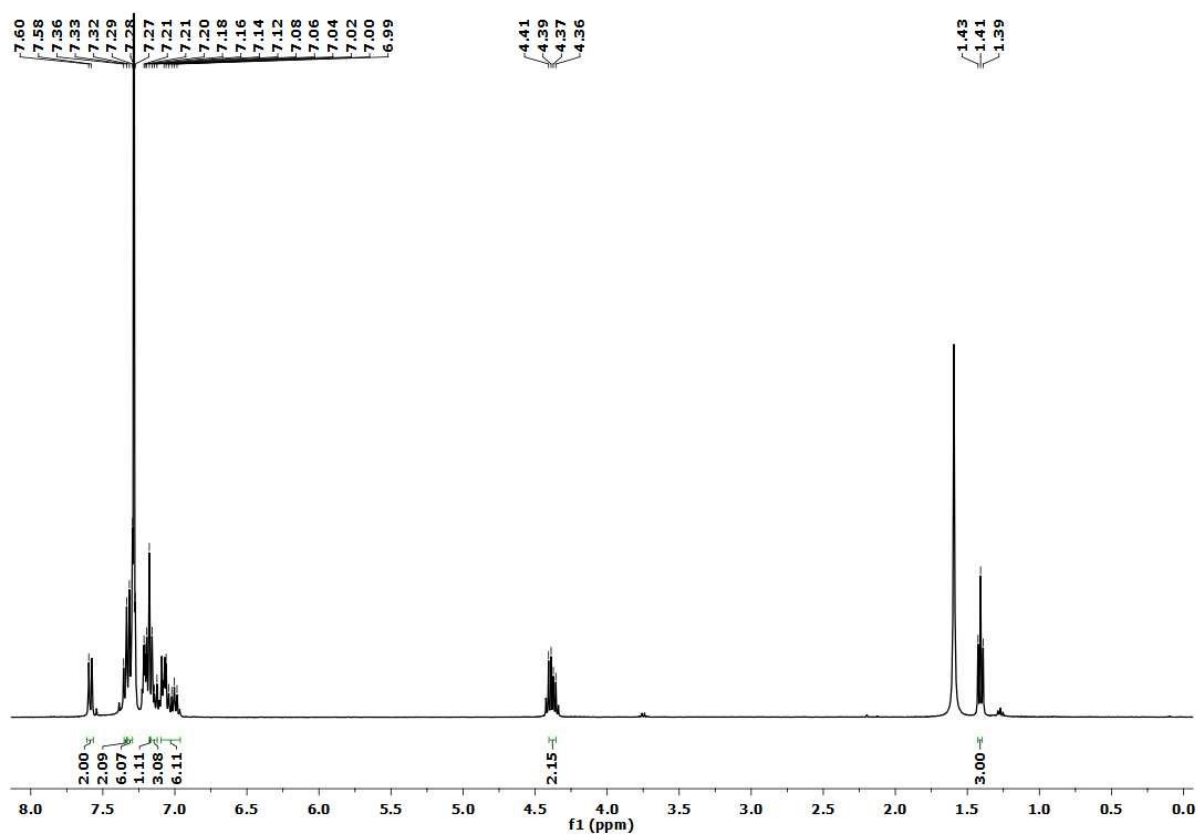

**Fig. S13** <sup>1</sup>H NMR spectrum of TPA-PH.

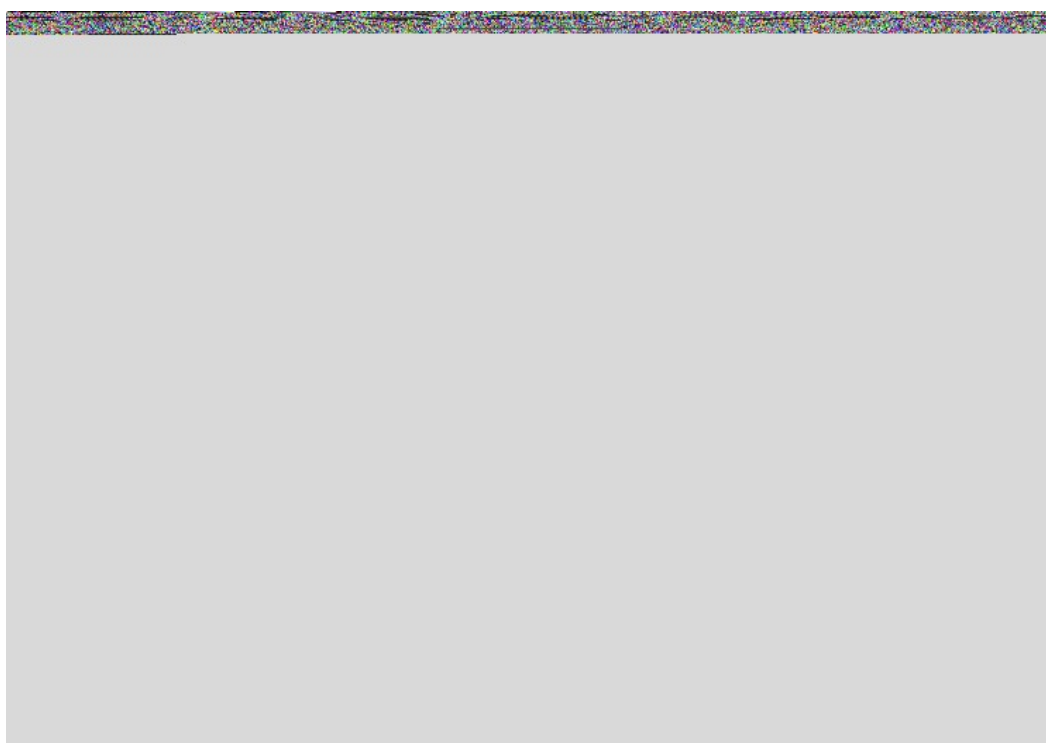

**Fig. S14** <sup>13</sup>C NMR spectrum of TPA-PH.

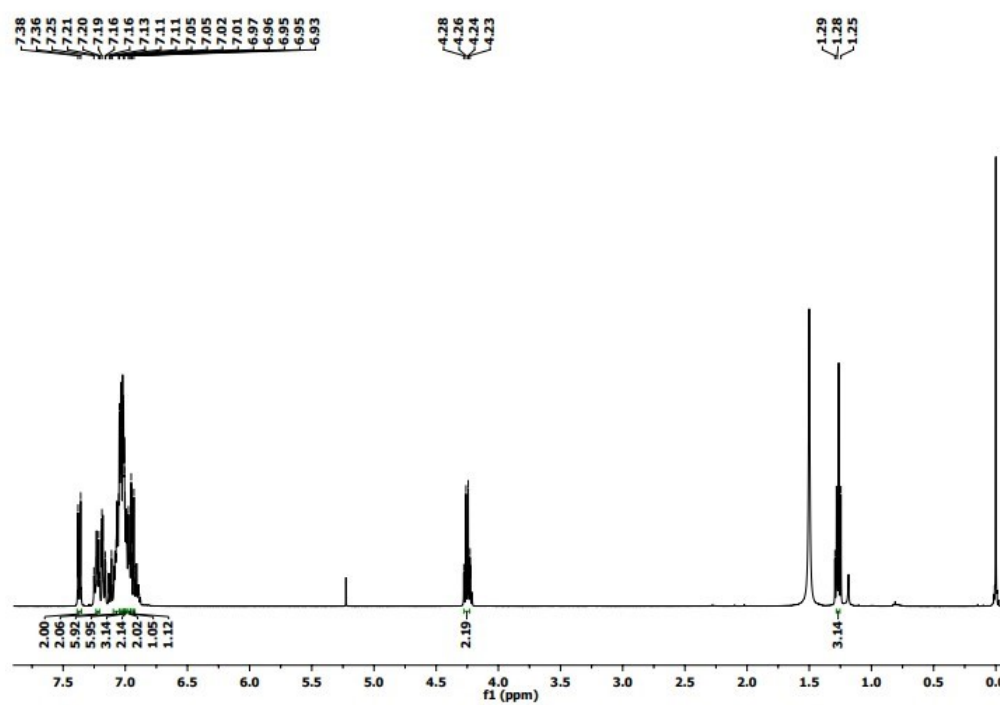

Fig. S15  $^1\text{H}$  NMR spectrum of TPE-PH.

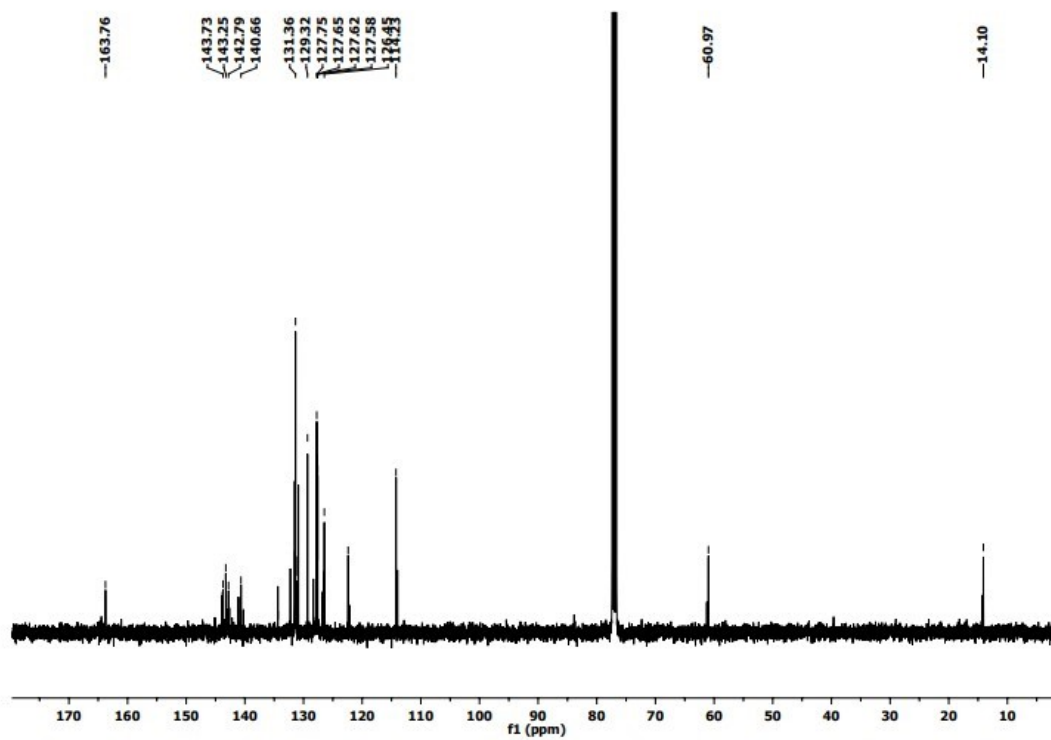

Fig. S16  $^{13}\text{C}$  NMR spectrum of TPE-PH.

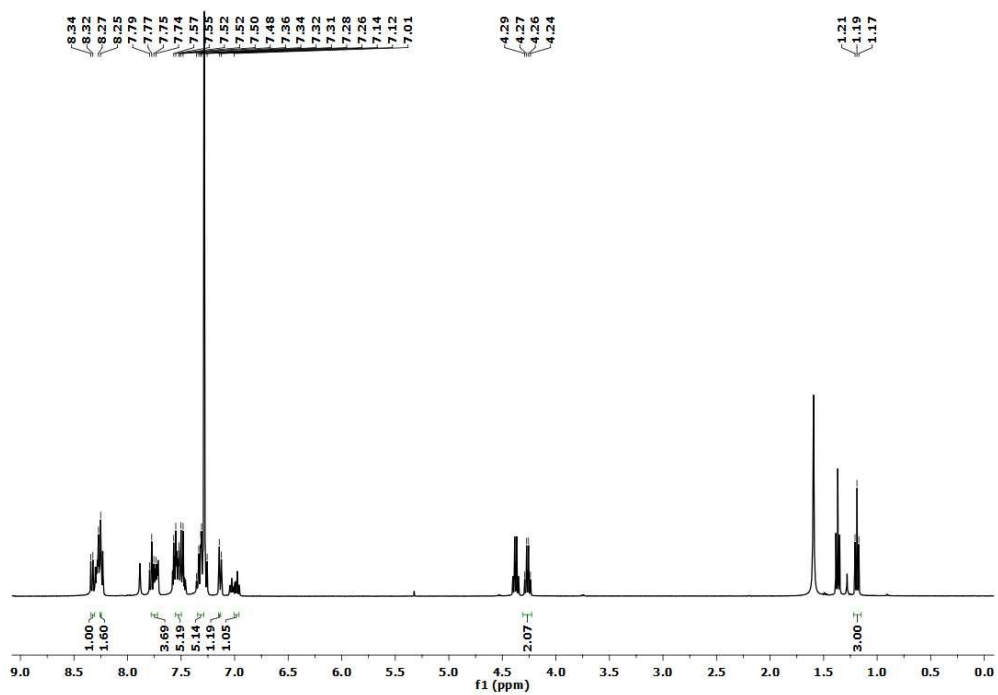

**Fig. S17** <sup>1</sup>H NMR spectrum of PY-PH.

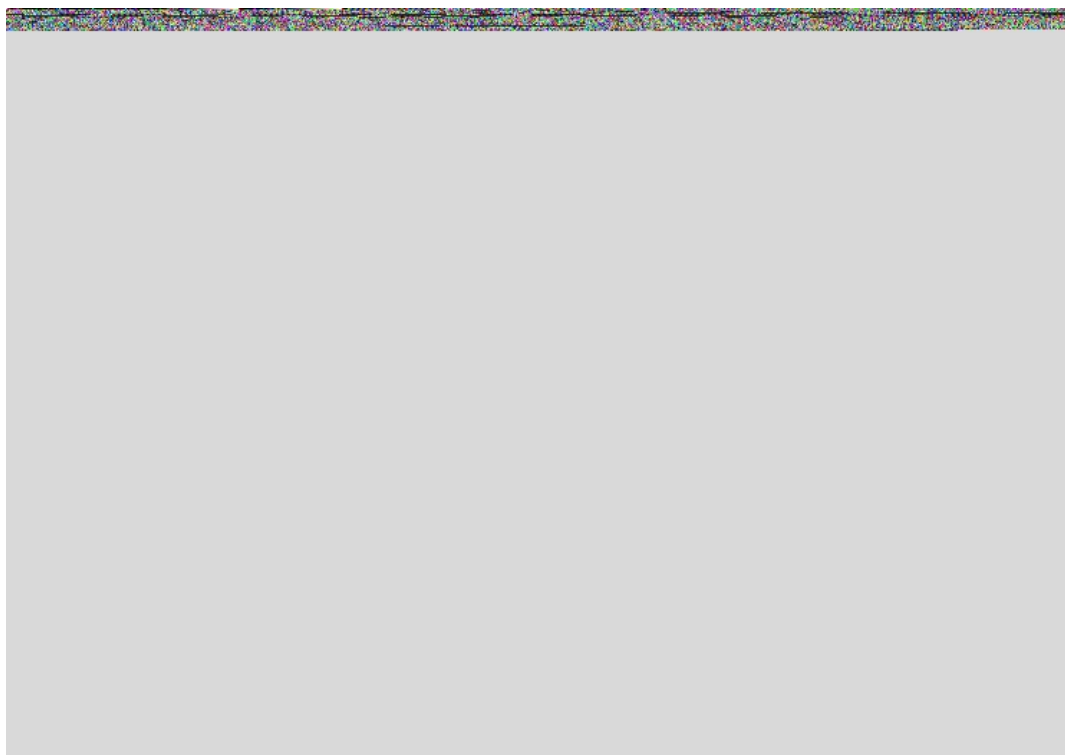

**Fig. S18** <sup>13</sup>C NMR spectrum of PY-PH.

## 5. Mass Analysis

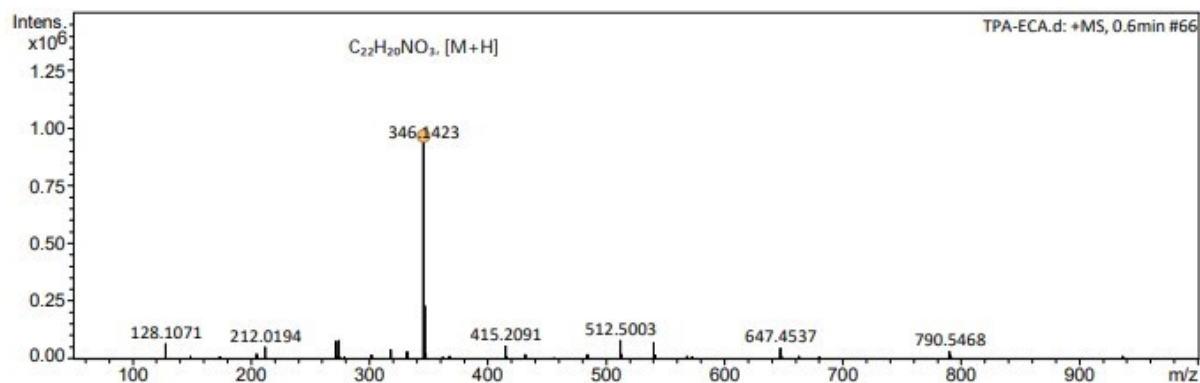

Fig. S19 Mass spectrum of 1.

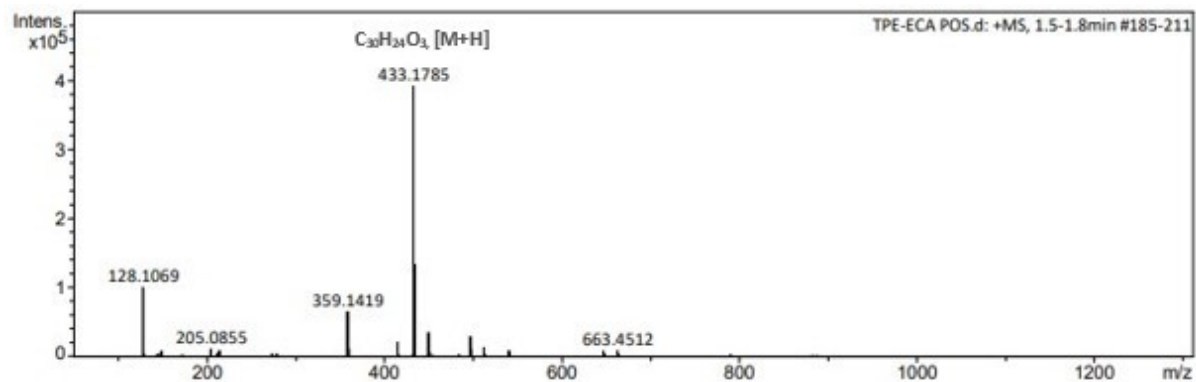

Fig. S20 Mass spectrum of 2.

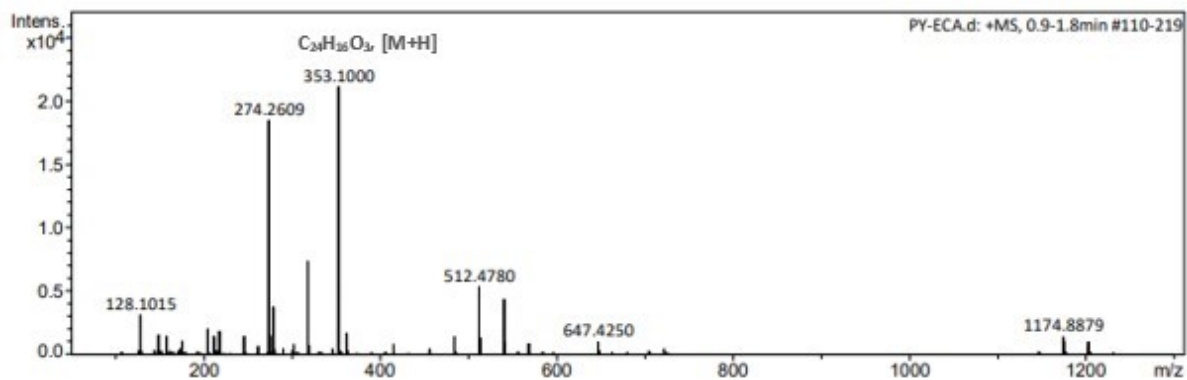

Fig. S21 Mass spectrum of 3.

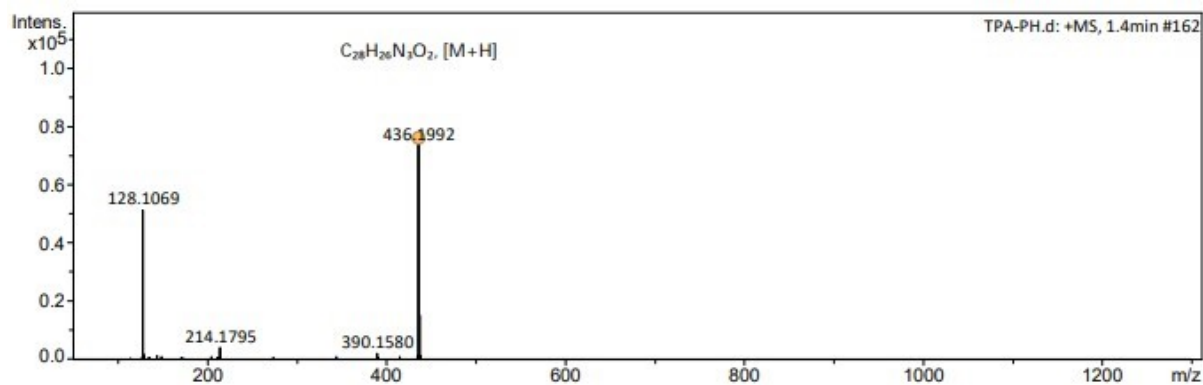

**Fig. S22** Mass spectrum of TPA-PH.

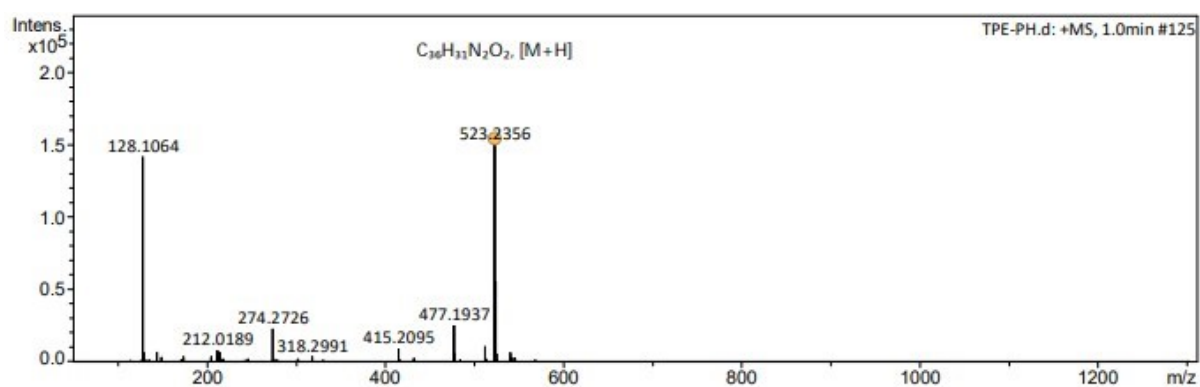

**Fig. S23** Mass spectrum of TPE-PH.

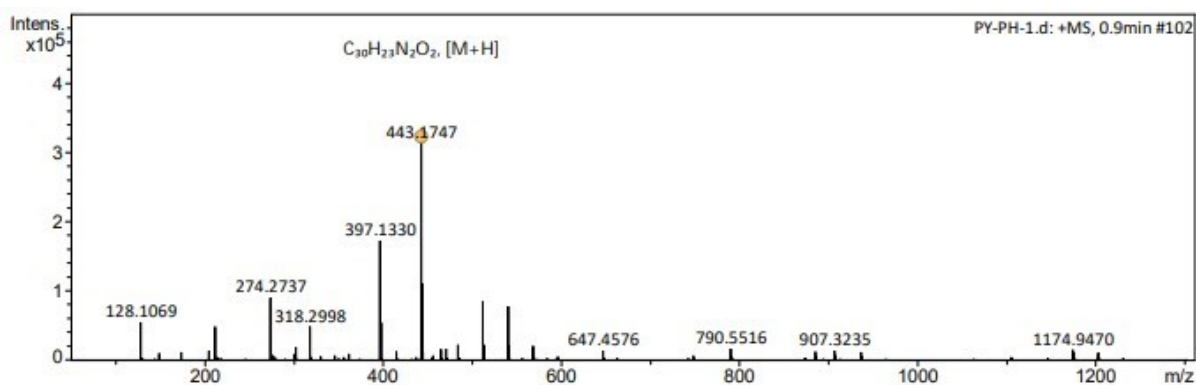

**Fig. S24** Mass spectrum of PY-PH.



## 6. Single Crystal X-ray Crystallography Studies

**Table S1.** Crystal data and structural refinement for compounds **TPA-PH**, **TPE-PH** and **PY-PH**

| Compound                                     | TPA-PH                                                        | TPE-PH                                                        | PY-PH                                                         |
|----------------------------------------------|---------------------------------------------------------------|---------------------------------------------------------------|---------------------------------------------------------------|
| Empirical formula                            | C <sub>28</sub> H <sub>25</sub> N <sub>3</sub> O <sub>2</sub> | C <sub>36</sub> H <sub>30</sub> N <sub>2</sub> O <sub>2</sub> | C <sub>30</sub> H <sub>22</sub> N <sub>2</sub> O <sub>2</sub> |
| Formula weight                               | 435.51                                                        | 522.62                                                        | 442.49                                                        |
| T [K]                                        | 273(2)                                                        | 273.15                                                        | 273(2)                                                        |
| Crystal system                               | triclinic                                                     | triclinic                                                     | orthorhombic                                                  |
| Space group                                  | <i>P</i> -1                                                   | <i>P</i> -1                                                   | <i>Pccn</i>                                                   |
| a, Å                                         | 9.8616(13)                                                    | 9.2561(5)                                                     | 40.059(3)                                                     |
| b, Å                                         | 9.9362(14)                                                    | 12.7971(7)                                                    | 12.3227(6)                                                    |
| c, Å                                         | 14.0691(19)                                                   | 13.9549(10)                                                   | 9.5736(6)                                                     |
| α, deg                                       | 83.174(4)                                                     | 73.7090(10)                                                   | 90                                                            |
| β, deg                                       | 73.214(3)                                                     | 70.63                                                         | 90                                                            |
| γ, deg                                       | 61.320(3)                                                     | 68.80                                                         | 90                                                            |
| Volume (Å <sup>3</sup> )                     | 1157.6(3)                                                     | 1429.44(15)                                                   | 4725.9(5)                                                     |
| Z                                            | 2                                                             | 2                                                             | 8                                                             |
| d <sub>calc</sub> (mg/cm <sup>3</sup> )      | 1.249                                                         | 1.214                                                         | 1.244                                                         |
| μ (mm <sup>-1</sup> )                        | 0.080                                                         | 0.075                                                         | 0.078                                                         |
| F(000)                                       | 460.0                                                         | 552.0                                                         | 1856.0                                                        |
| Crystal size/mm <sup>3</sup>                 | 0.36 × 0.34 × 0.17                                            | 0.18 × 0.14 × 0.03                                            | 0.34 × 0.18 × 0.02                                            |
| 2θ range for data collection/°               | 4.674 to 56.588                                               | 5.094 to 56.71                                                | 4.066 to 56.682                                               |
| Reflections collected                        | 25197                                                         | 14688                                                         | 62009                                                         |
| Data/restraints/parameters                   | 5680/0/299                                                    | 4950/6/366                                                    | 5896/3/318                                                    |
| Goodness-of-fit on F <sup>2</sup>            | 1.063                                                         | 1.005                                                         | 1.051                                                         |
| R [I>2σ (I)]                                 | R <sub>1</sub> = 0.0510<br>wR <sub>2</sub> = 0.1395           | R <sub>1</sub> = 0.0653<br>wR <sub>2</sub> = 0.1783           | R <sub>1</sub> = 0.0628<br>wR <sub>2</sub> = 0.2341           |
| R [all data]                                 | R <sub>1</sub> = 0.0593<br>wR <sub>2</sub> = 0.1476           | R <sub>1</sub> = 0.1269<br>wR <sub>2</sub> = 0.2191           | R <sub>1</sub> = 0.1405<br>wR <sub>2</sub> = 0.2469           |
| Largest diff. Peak/hole [e Å <sup>-3</sup> ] | 0.25/-0.17                                                    | 0.24/-0.13                                                    | 0.32/-0.17                                                    |
| CCDC number                                  | 2223713                                                       | 2223714                                                       | 2223715                                                       |

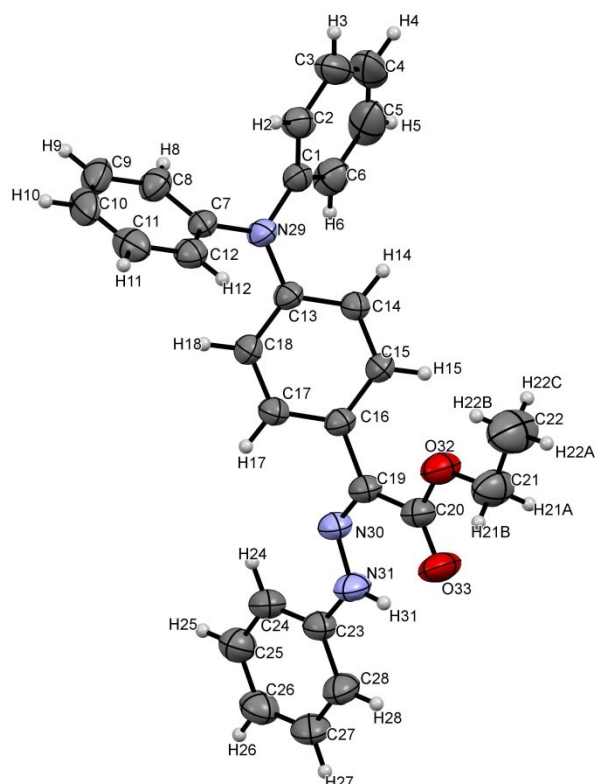

**Fig. S25** ORTEP diagram of TPA-PH.

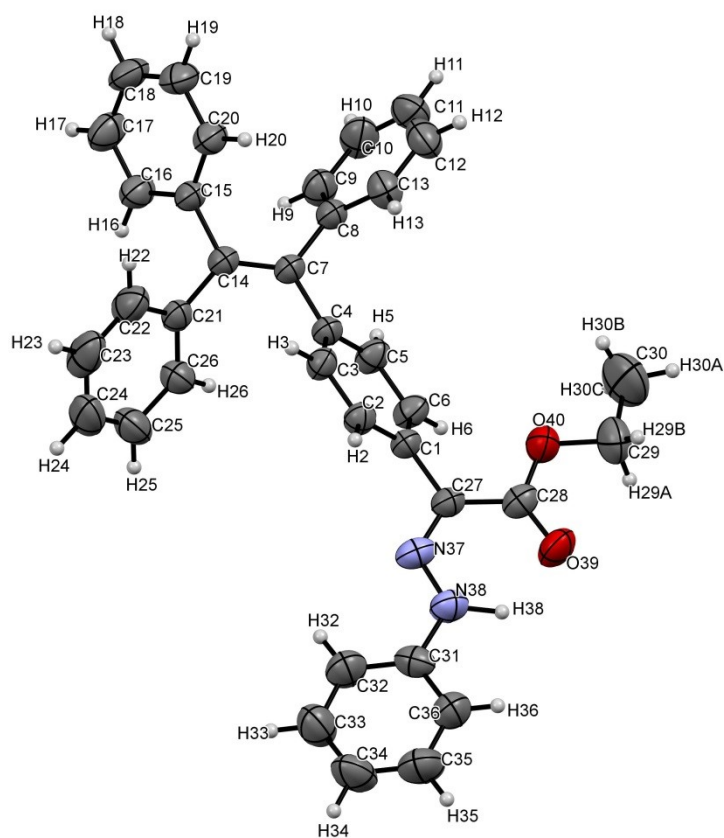

**Fig. S26** ORTEP diagram of TPE-PH.

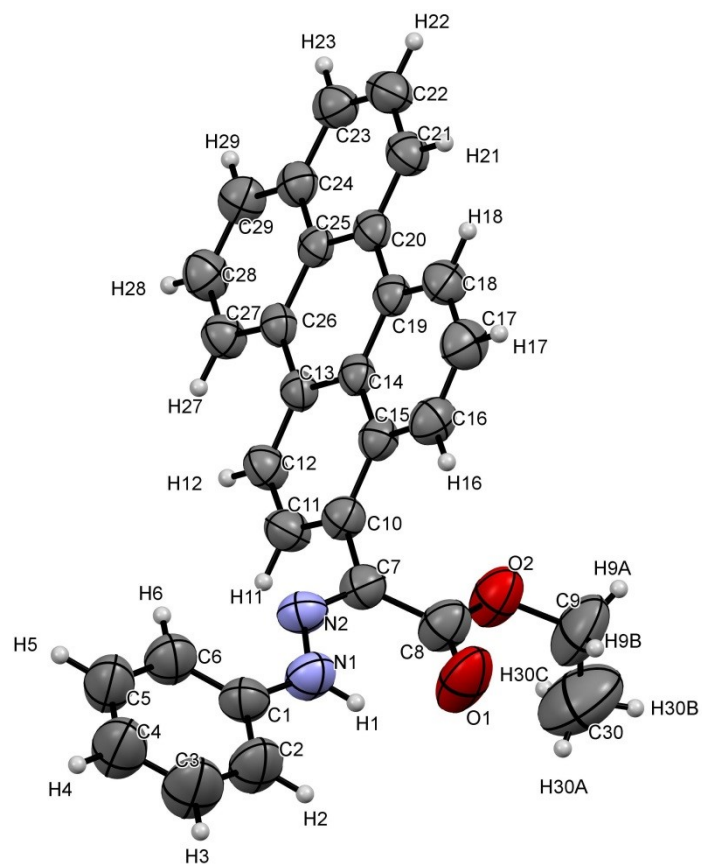

**Fig. S27** ORTEP diagram of PY-PH.

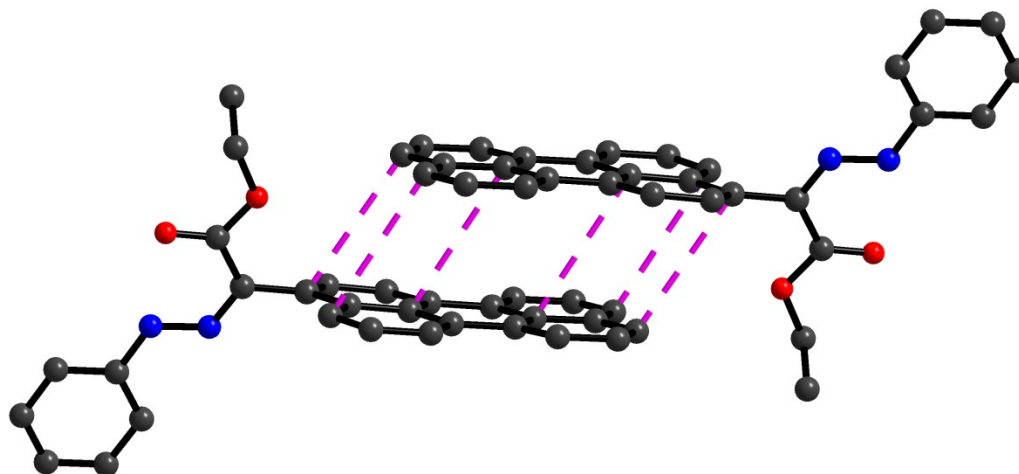

**Fig. S28** The  $\pi$ - $\pi$  stacking dimer formed in TPA-PH.

## 7. Aggregation-induced emission (AIE) studies

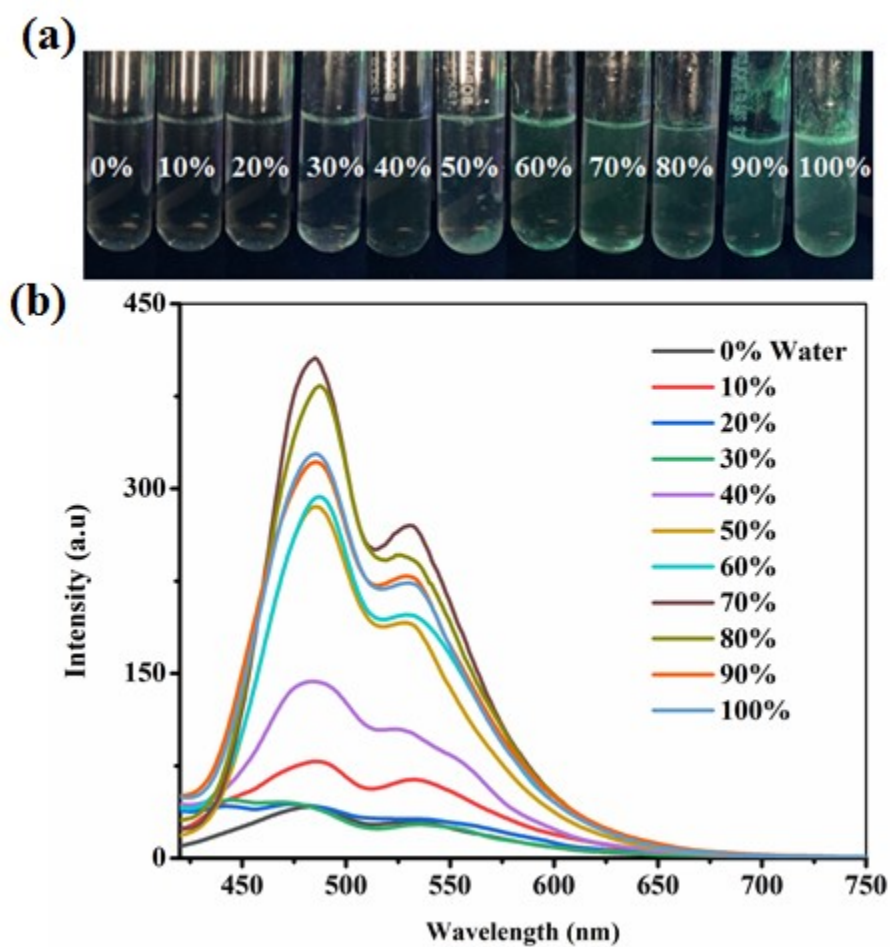

**Fig. S29** (a) Photographs of TPE-PH in THF-H<sub>2</sub>O mixture ( $f_w = 0$  to  $\sim 100\%$ ) under 365 nm UV light. (b) Emission spectra of TPE-PH in THF-H<sub>2</sub>O mixtures ( $1.0 \times 10^{-5}$  M) with different H<sub>2</sub>O fractions (0 to  $\sim 100\%$ ) at room temperature.

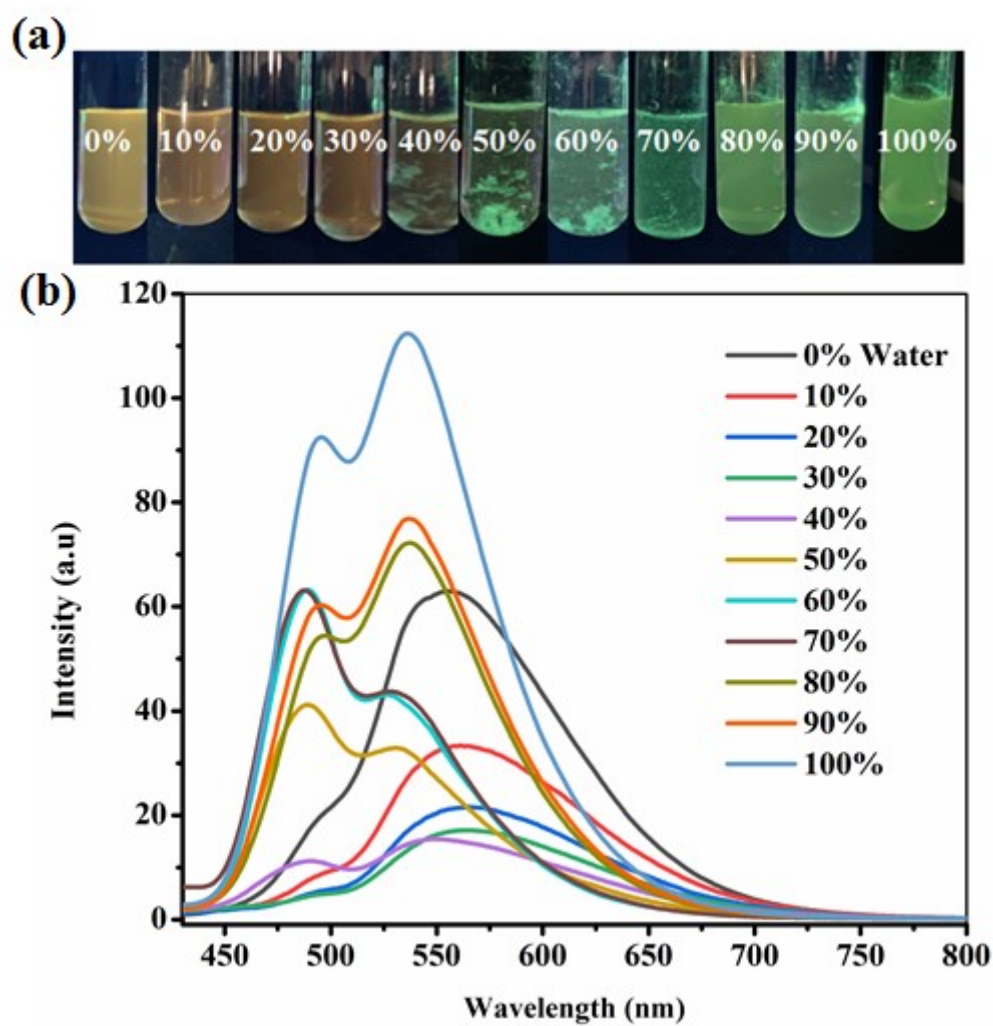

**Fig. S30** (a) Photographs of TPA-PH in THF-H<sub>2</sub>O mixture ( $f_w = 0$  to  $\sim 100\%$ ) under 365 nm UV light. (b) Emission spectra of TPA-PH in THF-H<sub>2</sub>O mixtures ( $1.0 \times 10^{-5}$  M) with different H<sub>2</sub>O fractions (0 to  $\sim 100\%$ ) at room temperature.

## 8. Photophysical studies

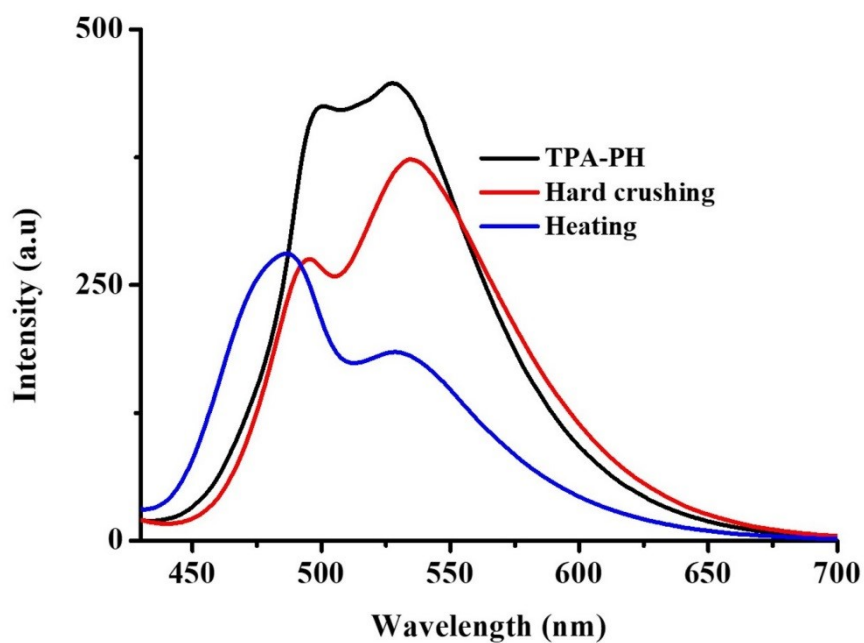

**Fig. S31** Mechanofluorochromism of TPA-PH.

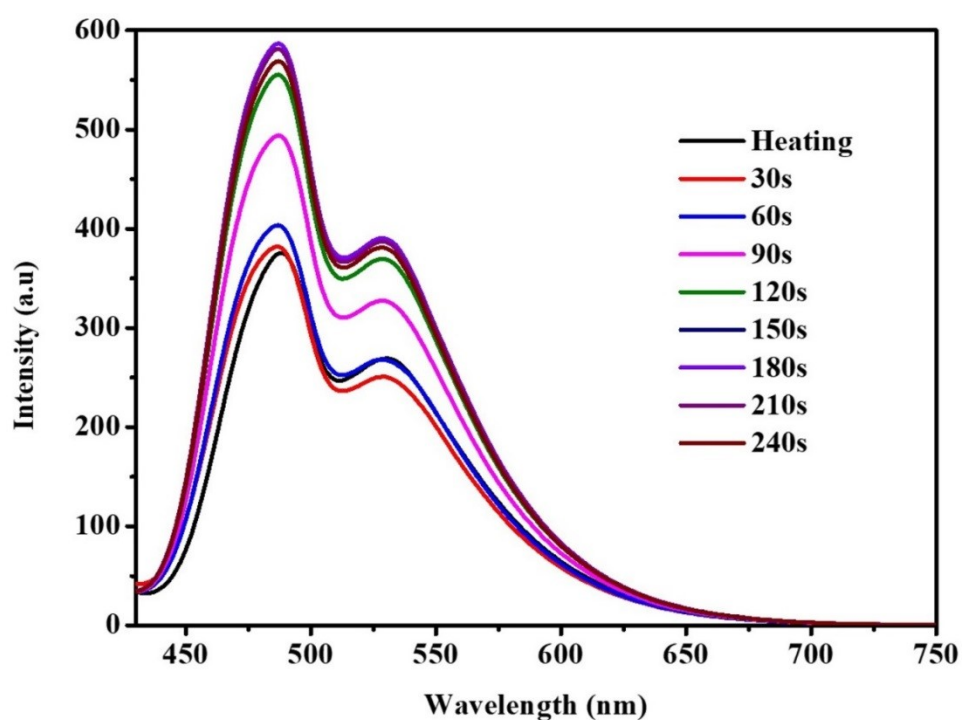

**Fig. S32** Fluorescence change upon cooling of heated TPA-PH showed clear increase of fluorescence intensity.

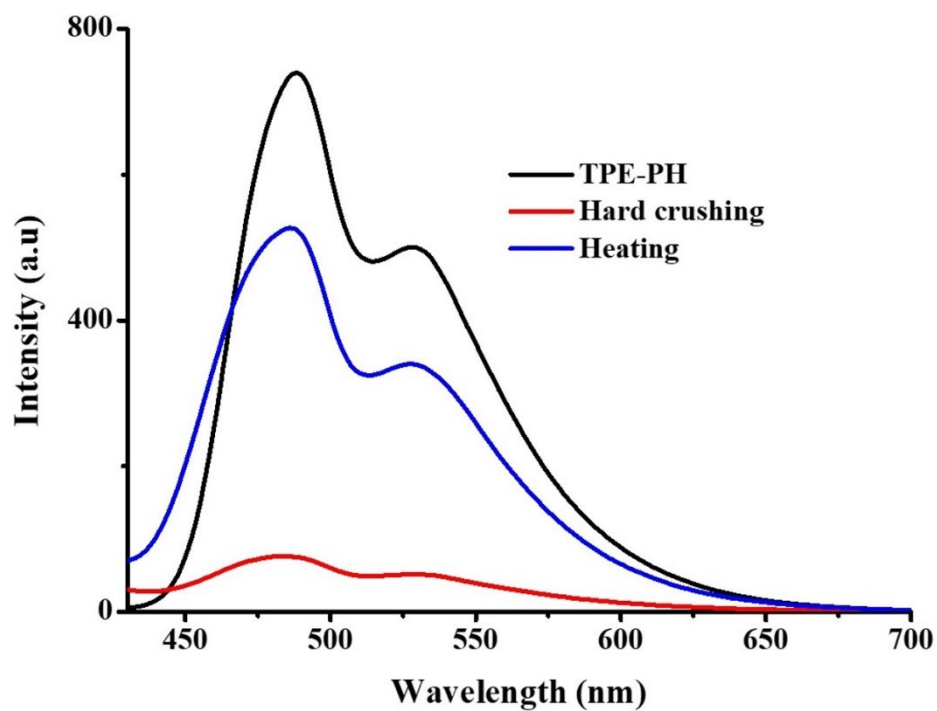

**Fig. S33** Mechanofluorochromism of TPE-PH.

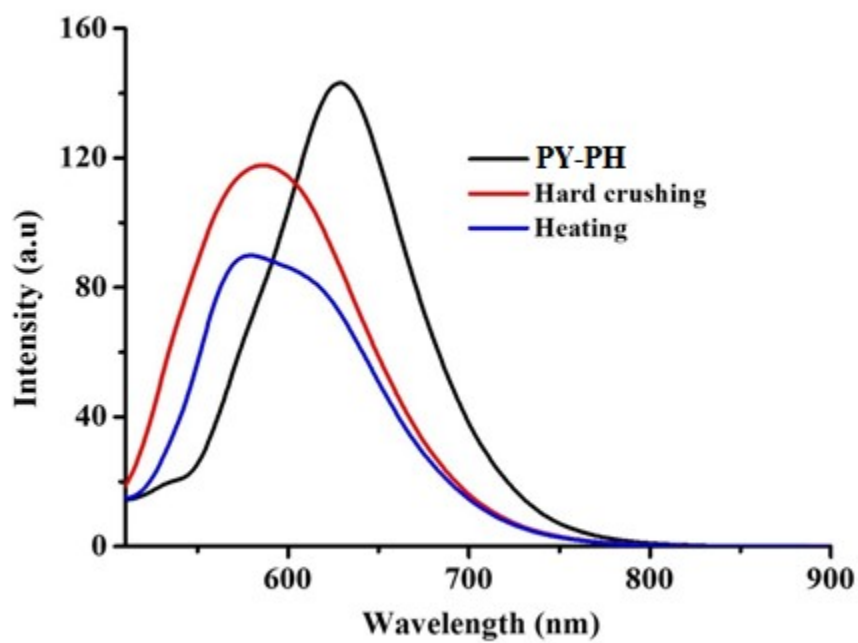

**Fig. S34** Mechanofluorochromism of PY-PH.



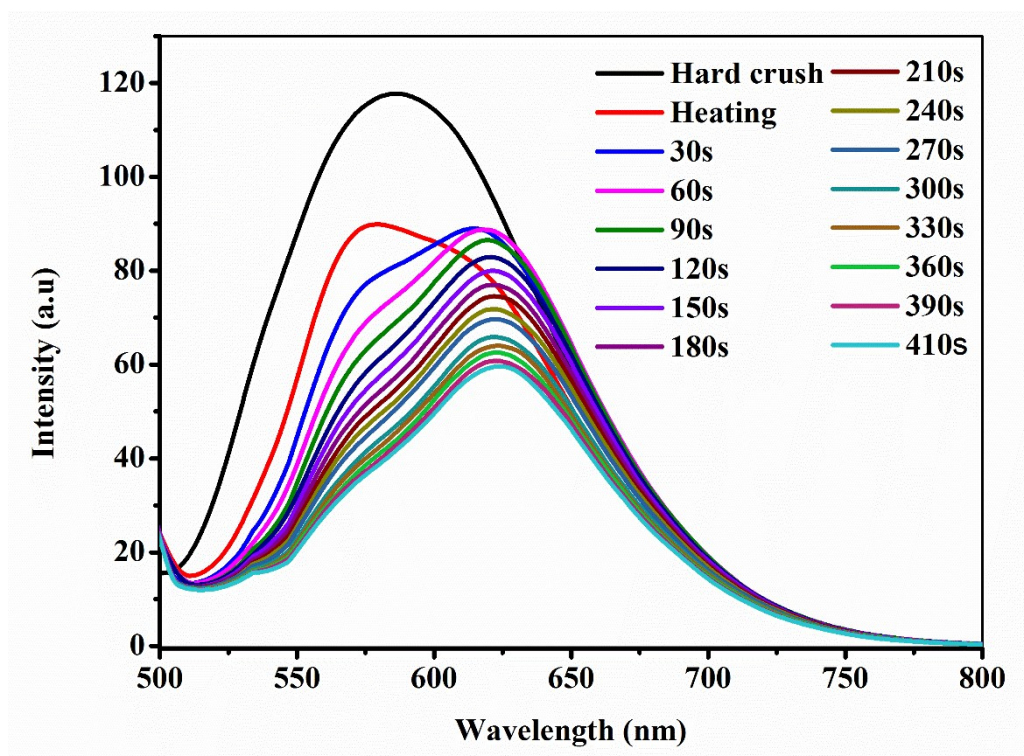

**Fig. S35** Irreversible fluorescence switching upon crushing/heating of PY-PH.



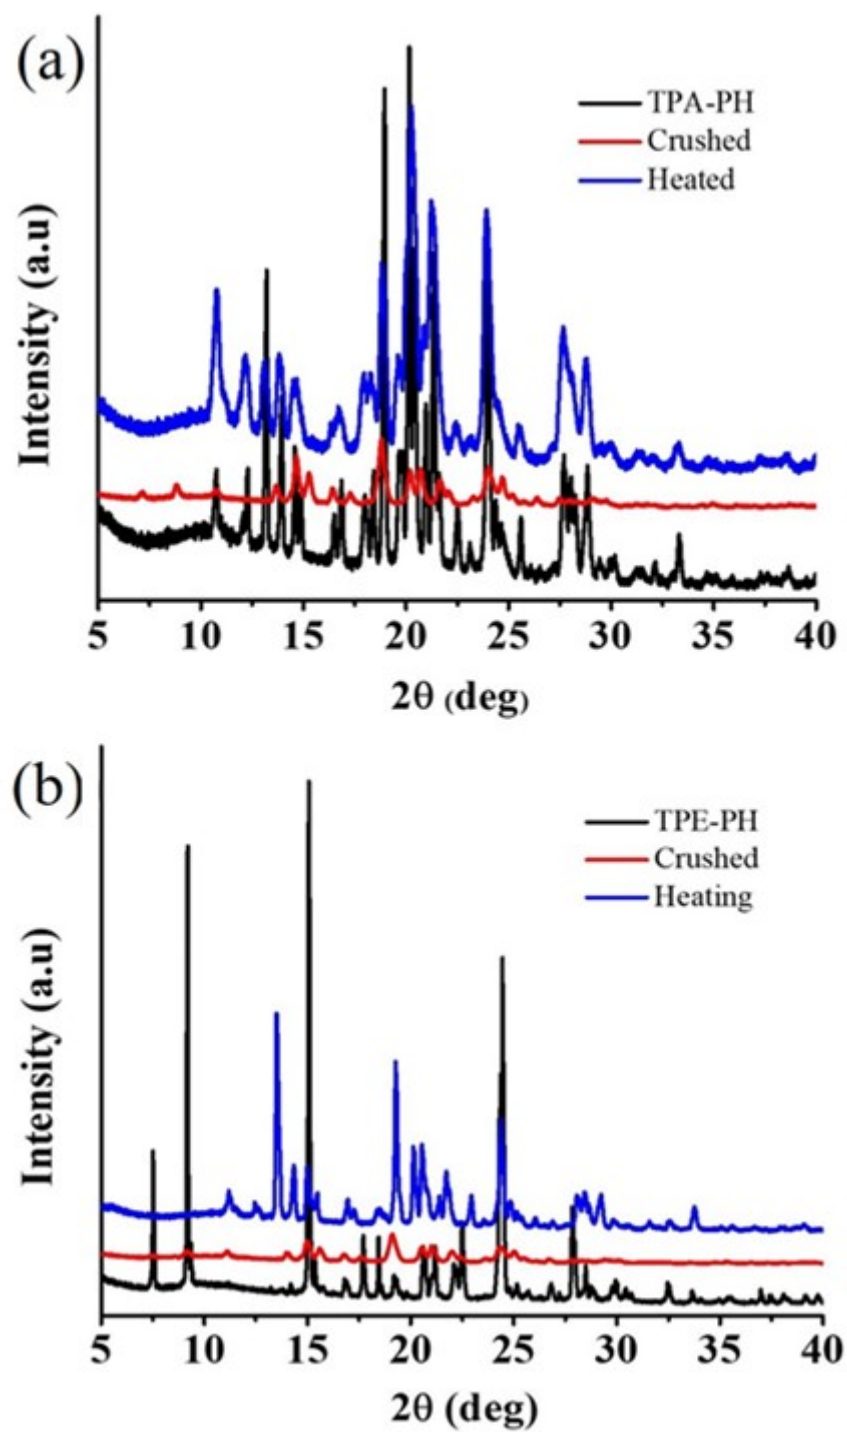

**Fig. S36** PXRD patterns of (a) TPA-PH and (b) TPE-PH at different state mechanofluorochromic studies,

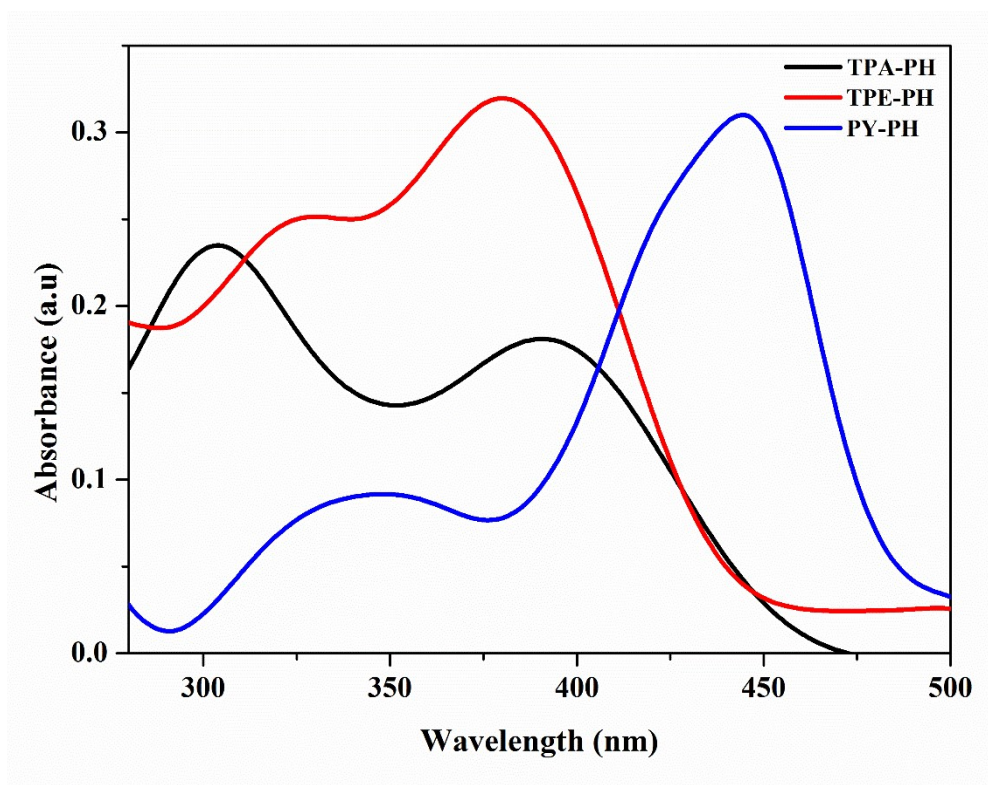

**Fig. S37** The absorption spectra of **TPA-PH**, **TPE-PH** and **PY-PH** measured in  $\text{CHCl}_3$  ( $1.0 \times 10^{-5}$  M) at room temperature.

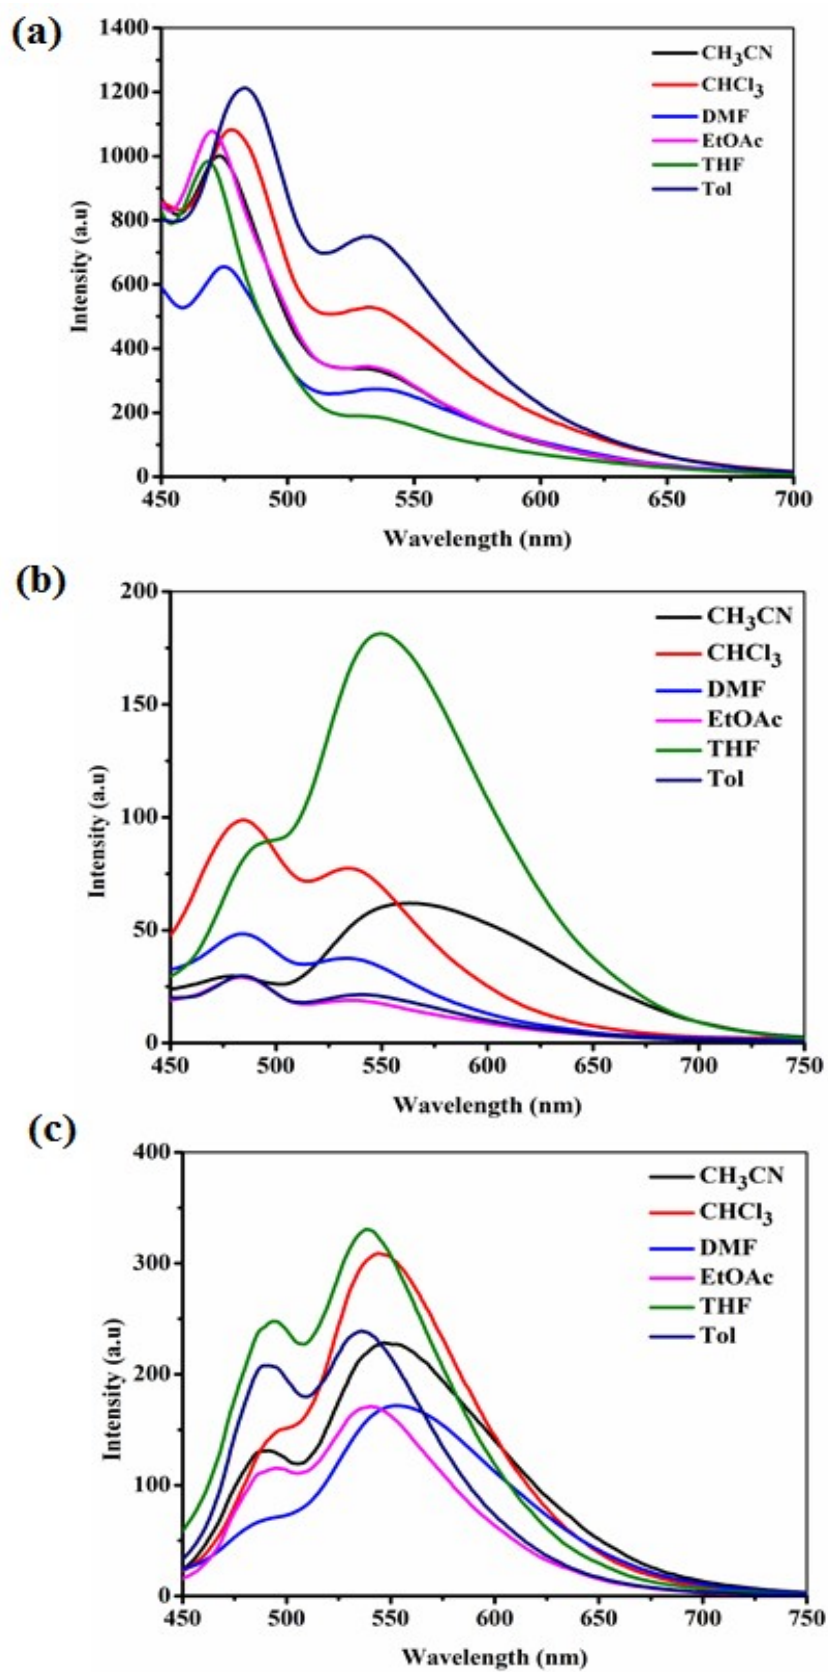

**Fig. S38** Solvatochromic studies of (a) PY-PH, (b) TPE-PH and (c) TPA-PH in different solvents.

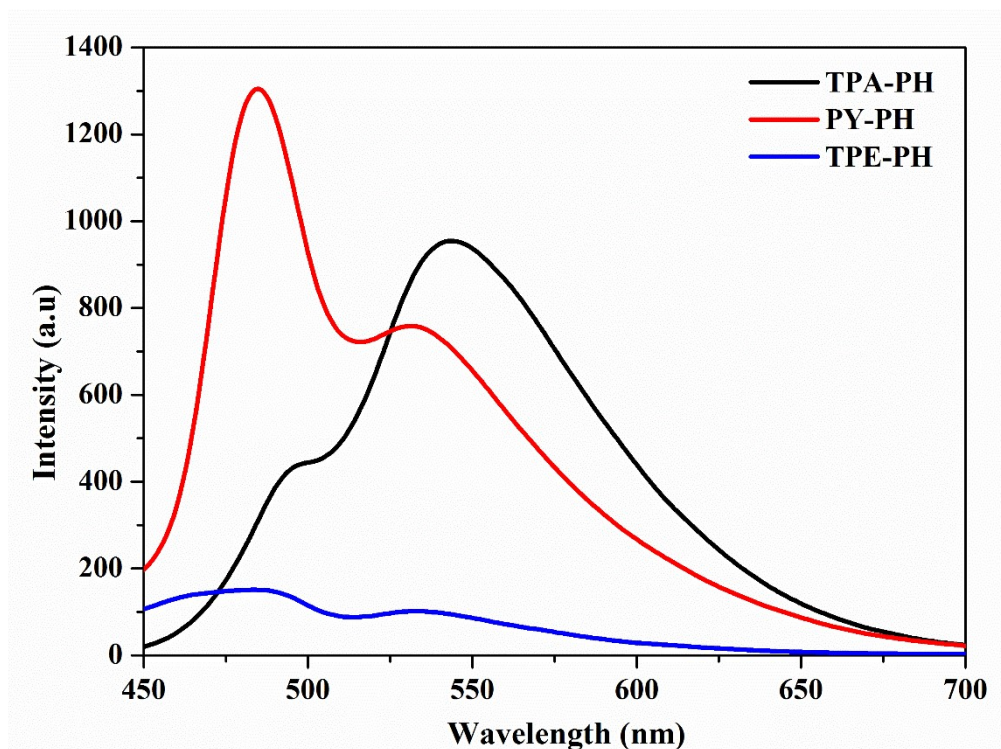

**Fig. S39** The fluorescence spectra of **TPA-PH**, **TPE-PH** and **PY-PH** measured in  $\text{CHCl}_3$  ( $1.0 \times 10^{-5}$  M) at room temperature.

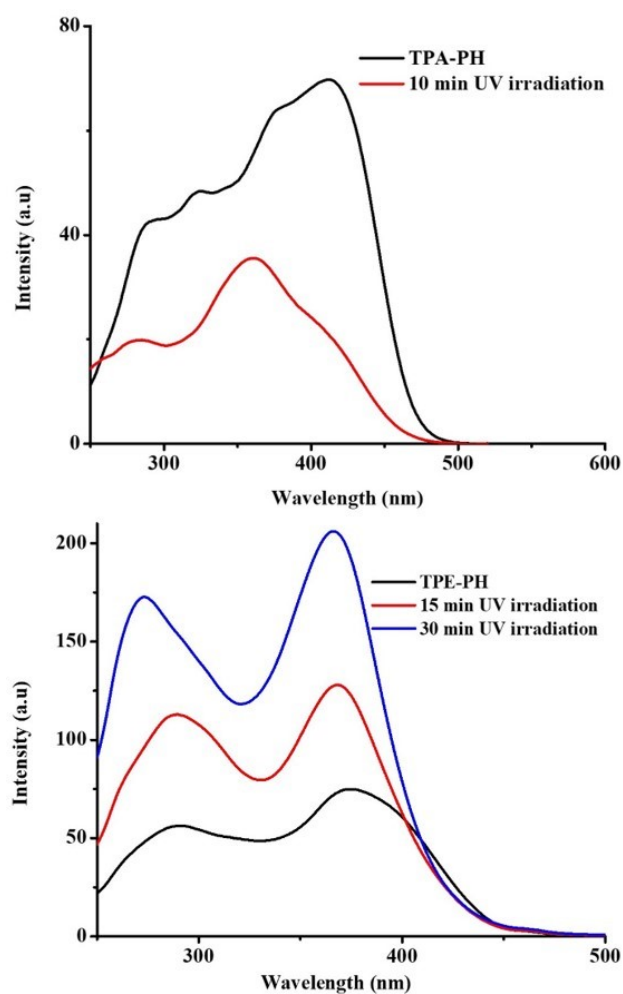

**Fig. S40** Excitation spectra for **TPA-PH** and **TPE-PH** measured in  $\text{CHCl}_3$  ( $1.0 \times 10^{-5}$  M) at room temperature.

**Table S2.** The photophysical properties of **TPA-PH**, **TPE-PH** and **PY-PH** measured in  $\text{CHCl}_3$  solution at room temperature. Quantum yield measured with respect to quinine sulphate standard.

| Compound      | $\lambda_{\text{max abs}}$ (nm) | $\lambda_{\text{max em}}$ (nm) <sup>a</sup> | $\lambda_{\text{max em}}$ (nm) <sup>b</sup> | $\Phi_f^a$ | $\Phi_f^b$ |
|---------------|---------------------------------|---------------------------------------------|---------------------------------------------|------------|------------|
| <b>TPA-PH</b> | 304 ( $\pi-\pi^*$ ), 390 (ICT)  | 497, 544                                    | 479, 537                                    | 0.23       | 0.15       |
| <b>TPE-PH</b> | 326 ( $\pi-\pi^*$ ), 380 (ICT)  | 477, 532                                    | 460, 532                                    | 0.02       | 0.21       |
| <b>PY-PH</b>  | 348 ( $\pi-\pi^*$ ), 444 (ICT)  | 484, 532                                    | 495, 541                                    | 0.34       | 0.24       |

<sup>a</sup>)before irradiation of light

<sup>b</sup>)after irradiation of light



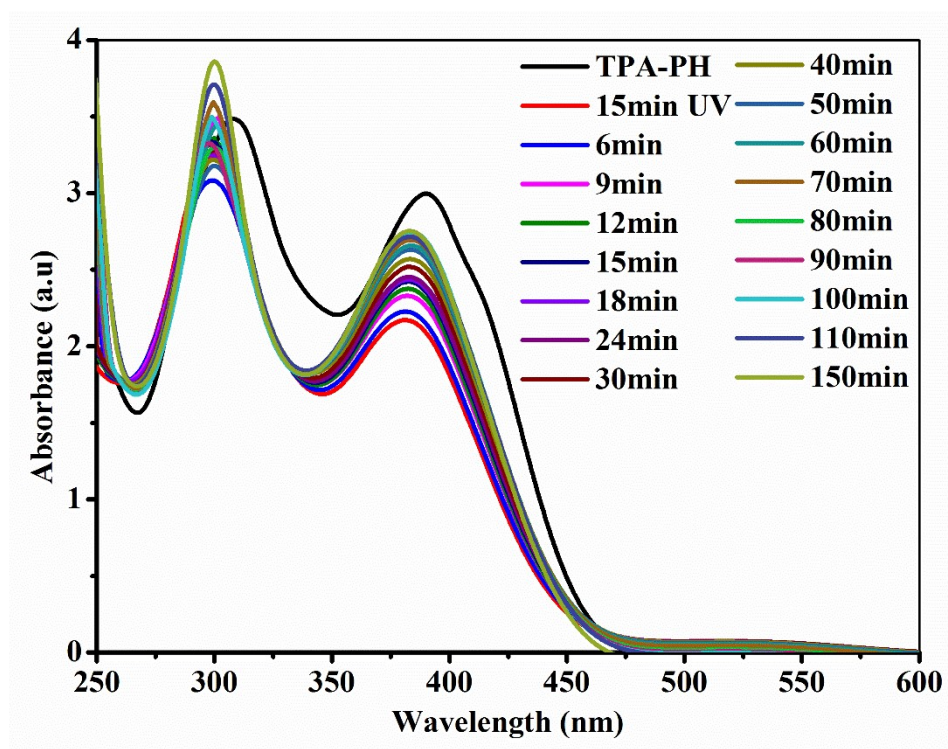

**Fig. S41** Absorption changes for reversible Z↔E photoisomerization of TPA-PH under irradiation of light in  $\text{CHCl}_3$  ( $1.0 \times 10^{-5} \text{ mol L}^{-1}$ ) in different time.

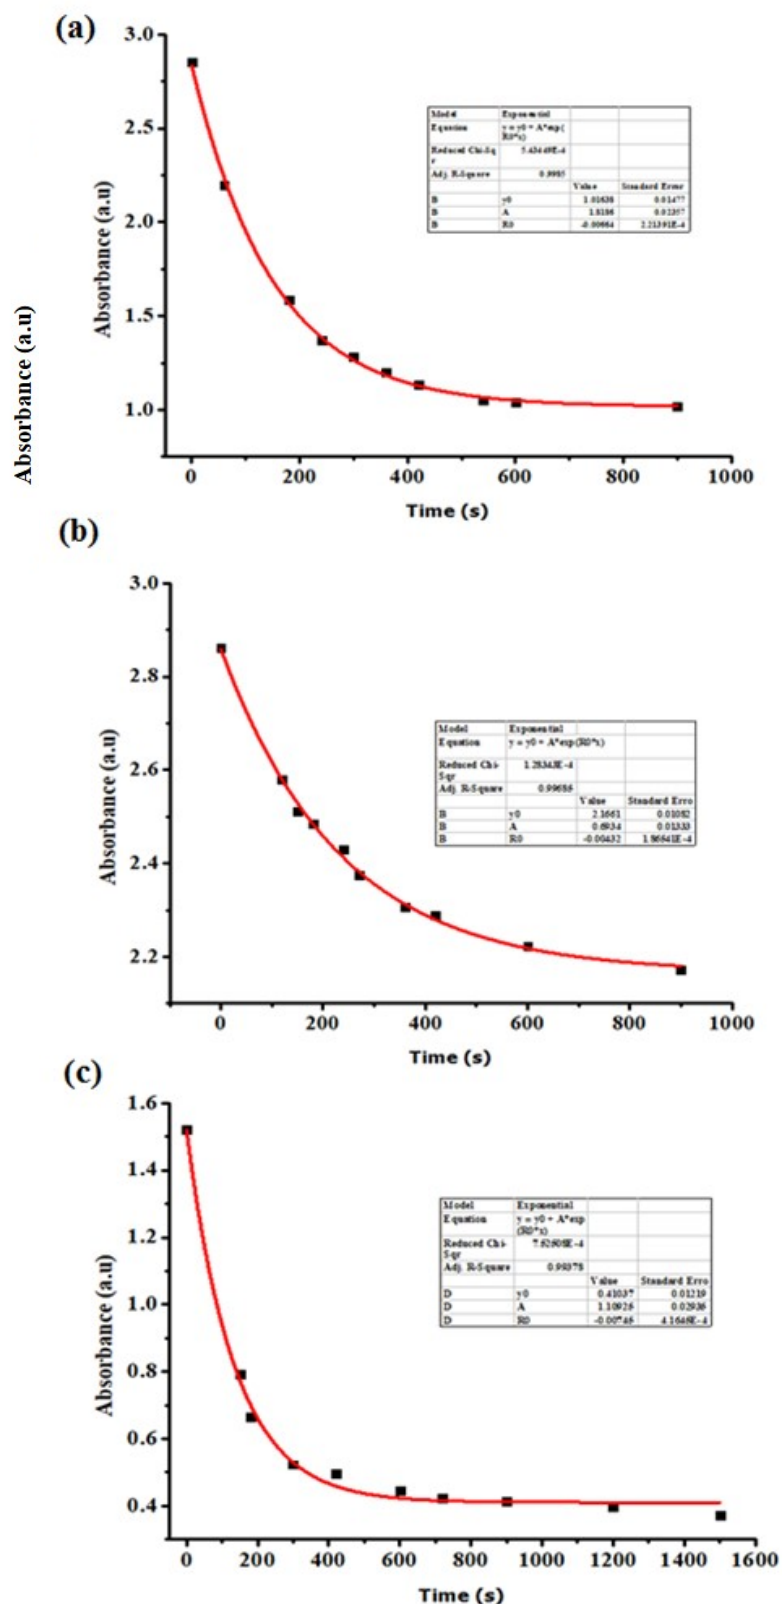

**Fig. S42** The plot for calculation of quantum yield for Z→E photoisomerization (irradiation at 365 nm) of (a) TPA-PH, (b) TPE-PH and (c) PY-PH in CHCl<sub>3</sub> ( $1 \times 10^{-5}$  M) using the absorbance ( $\lambda_{\max}$ ) of Z isomer as a function of time.

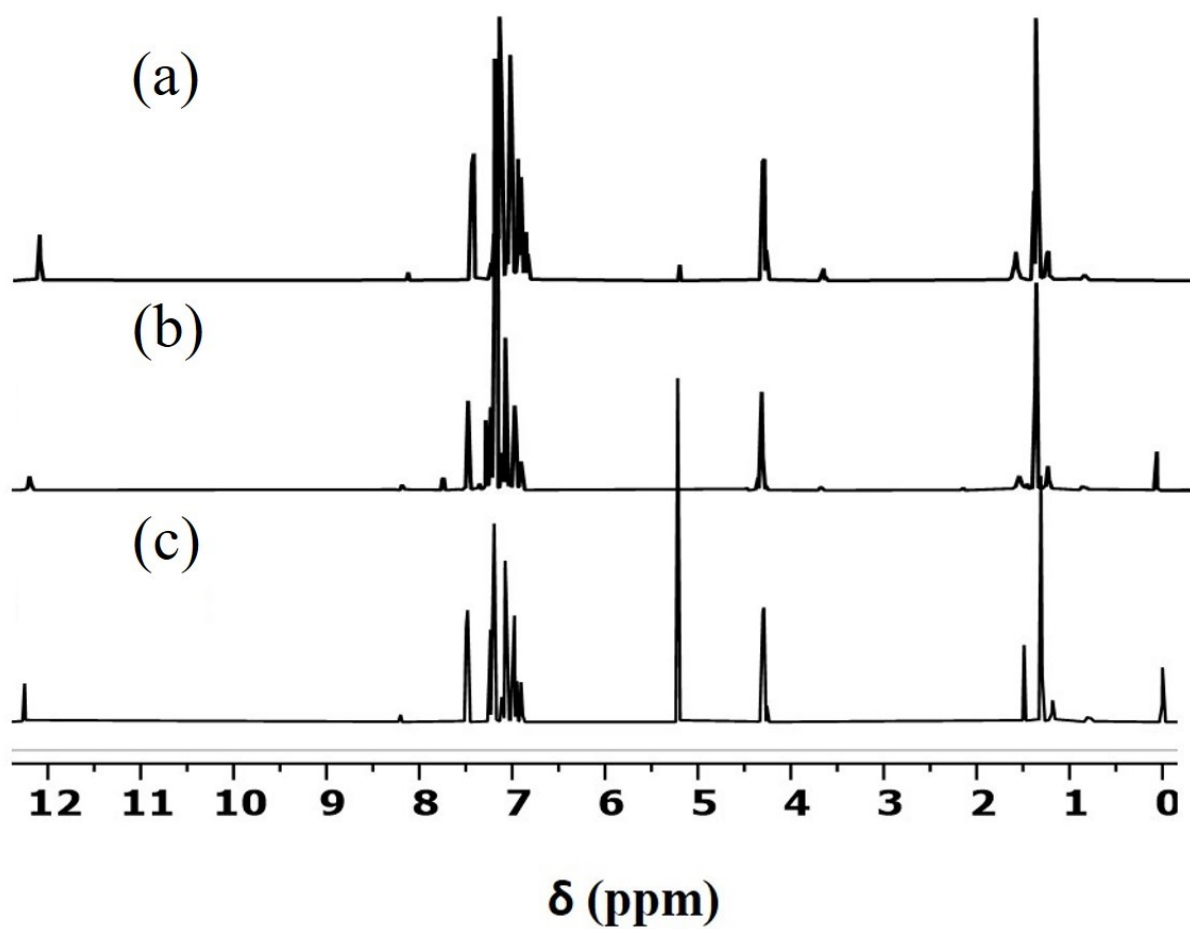

**Fig. S43**  $^1\text{H}$  NMR spectrum of TPA-PH. (a) before irradiation of light, (b) after irradiation of light, (c) after complete reversibility under the absence of light.



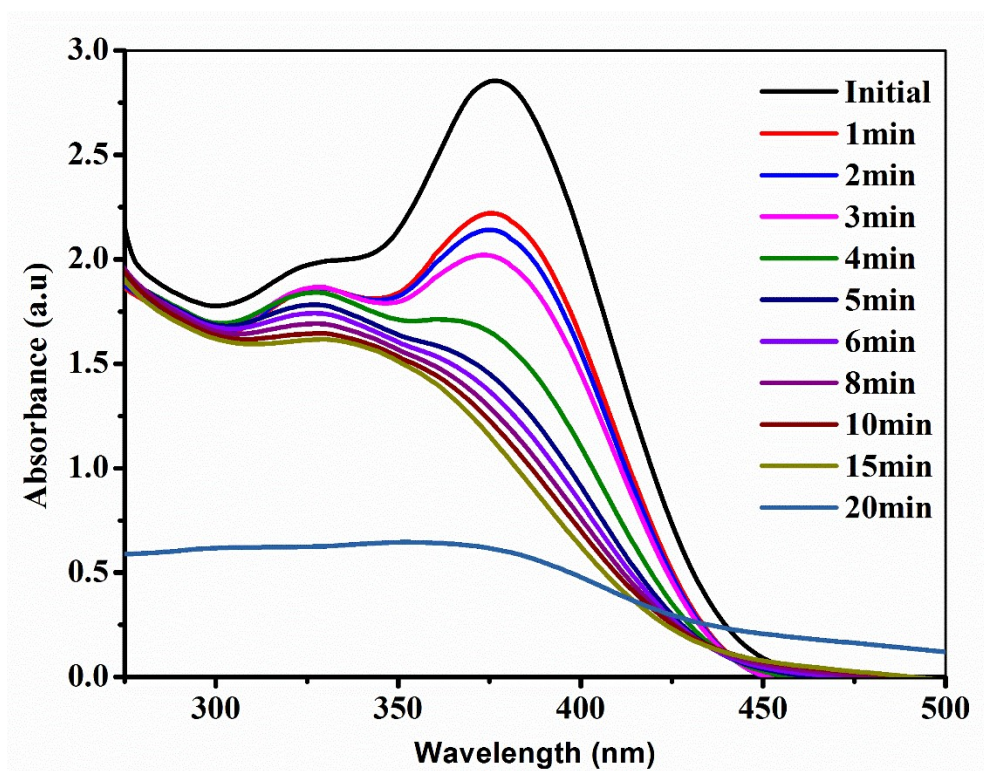

**Fig. S44** Absorption changes for reversible Z↔E photoisomerization of TPE-PH under irradiation of light in CHCl<sub>3</sub> ( $1.0 \times 10^{-5}$  mol L<sup>-1</sup>) in different time.

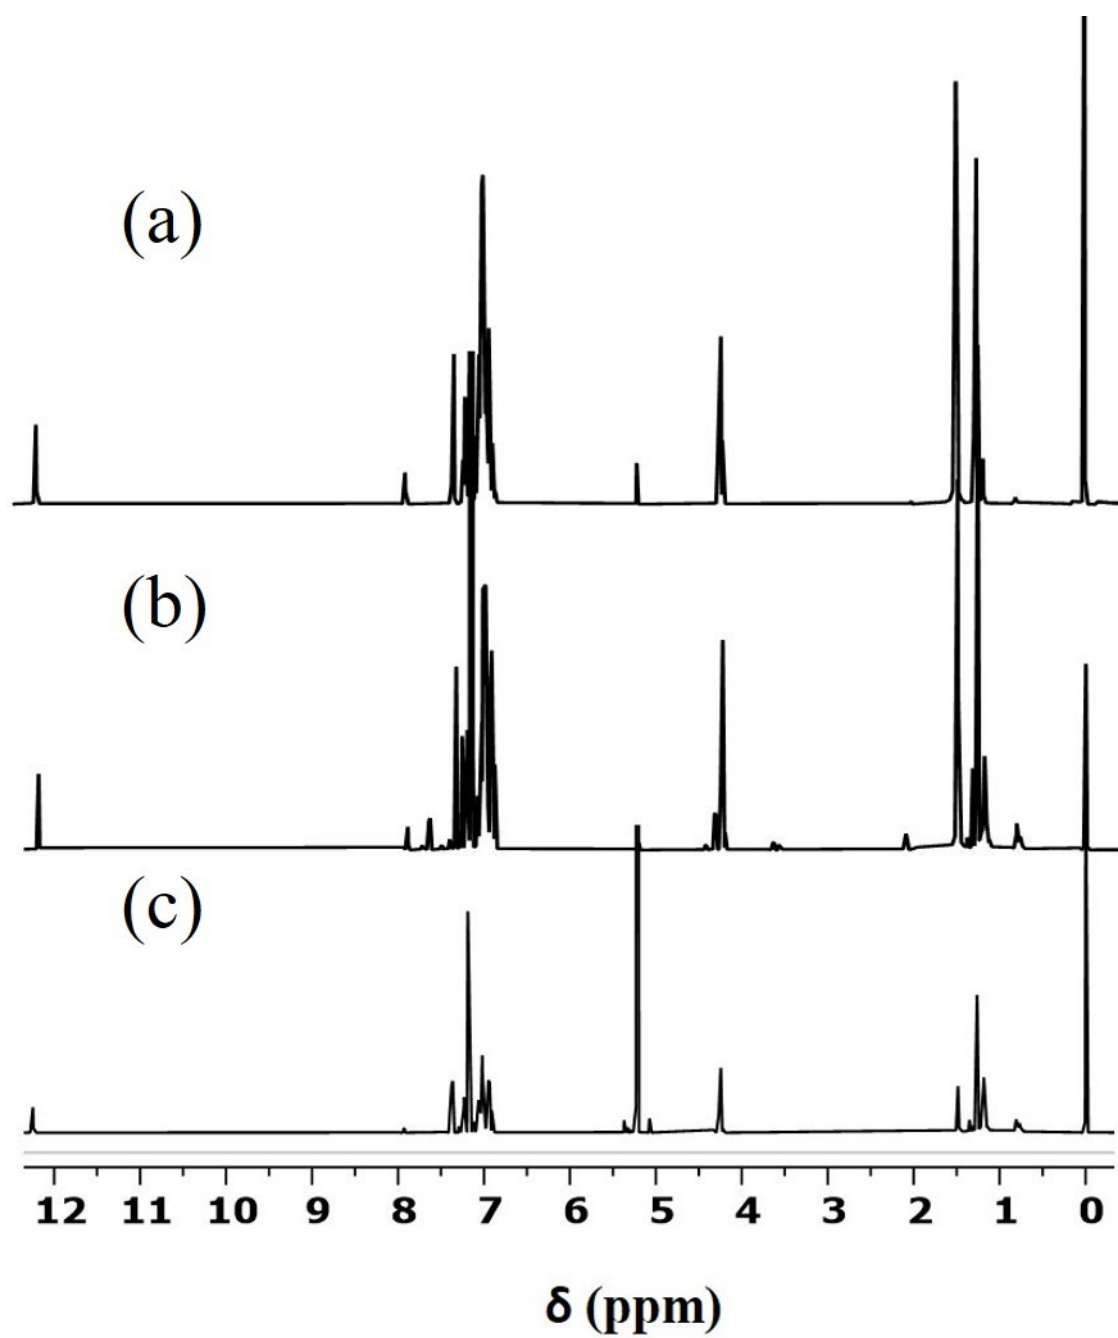

**Fig. S45.**  $^1\text{H}$  NMR spectrum of TPE-PH. (a) before irradiation of light, (b) after irradiation of light, (c) after complete reversibility under the absence of light.

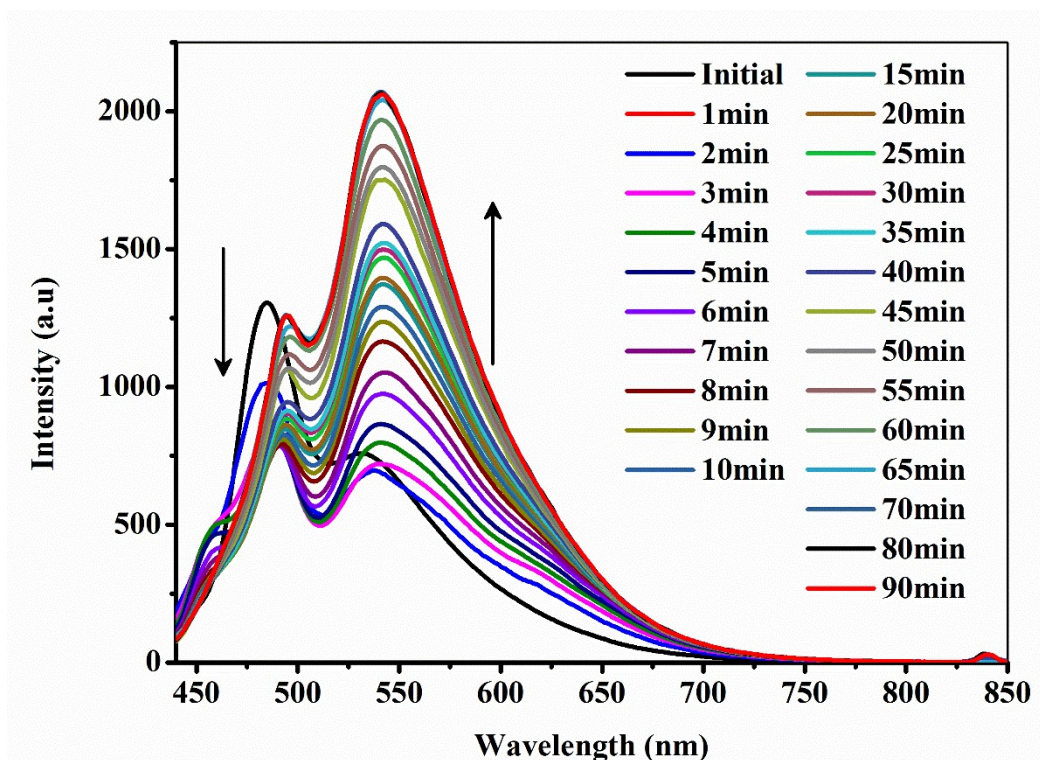

**Fig. S46**  $Z \rightarrow E$  photoisomerization of PY-PH upon irradiation of light in  $\text{CHCl}_3$  ( $1.0 \times 10^{-5} \text{ M}$ )

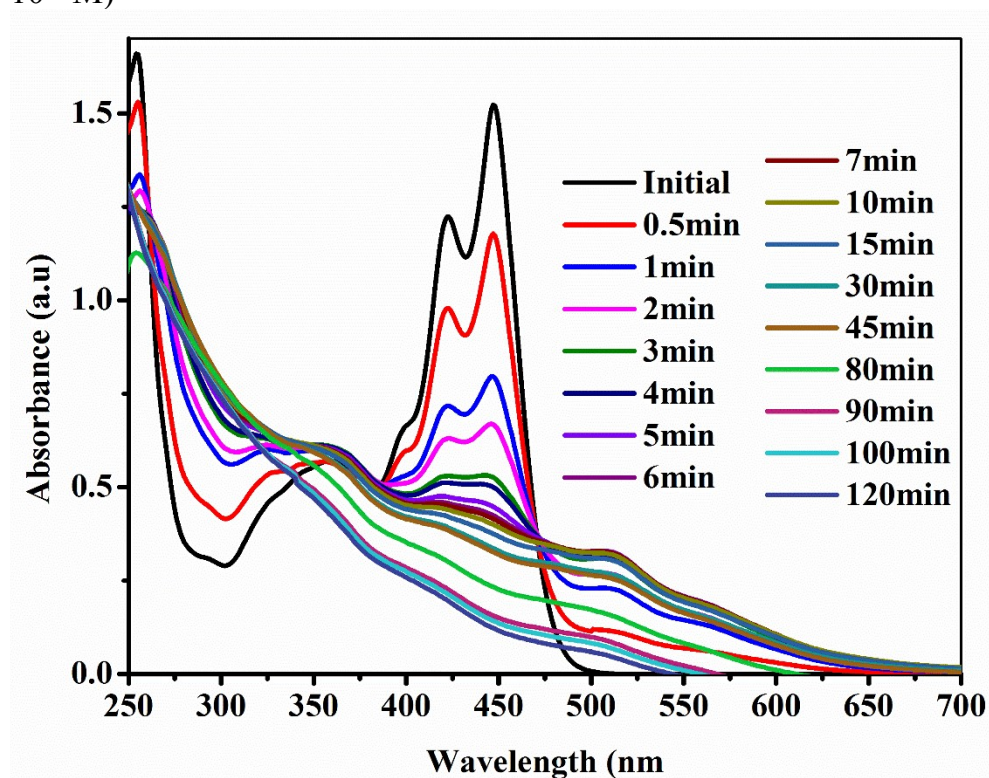

**Fig. S47** Absorption changes for irreversible  $Z \leftrightarrow E$  photoisomerization of PY-PH under irradiation of light in  $\text{CHCl}_3$  ( $1.0 \times 10^{-5} \text{ mol L}^{-1}$ ) in different time.

(a)

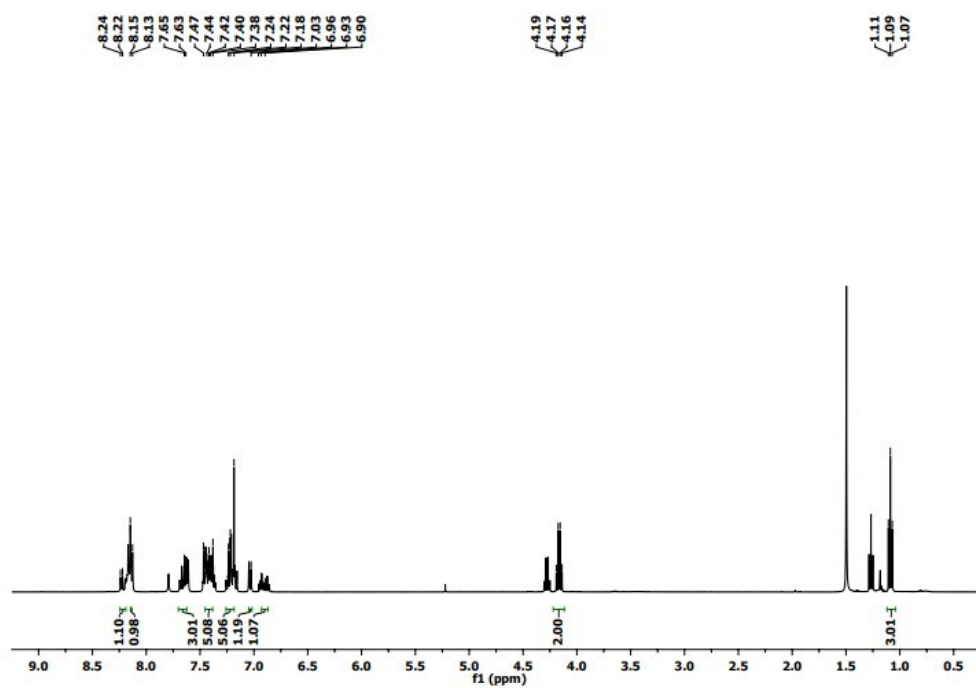

(b)

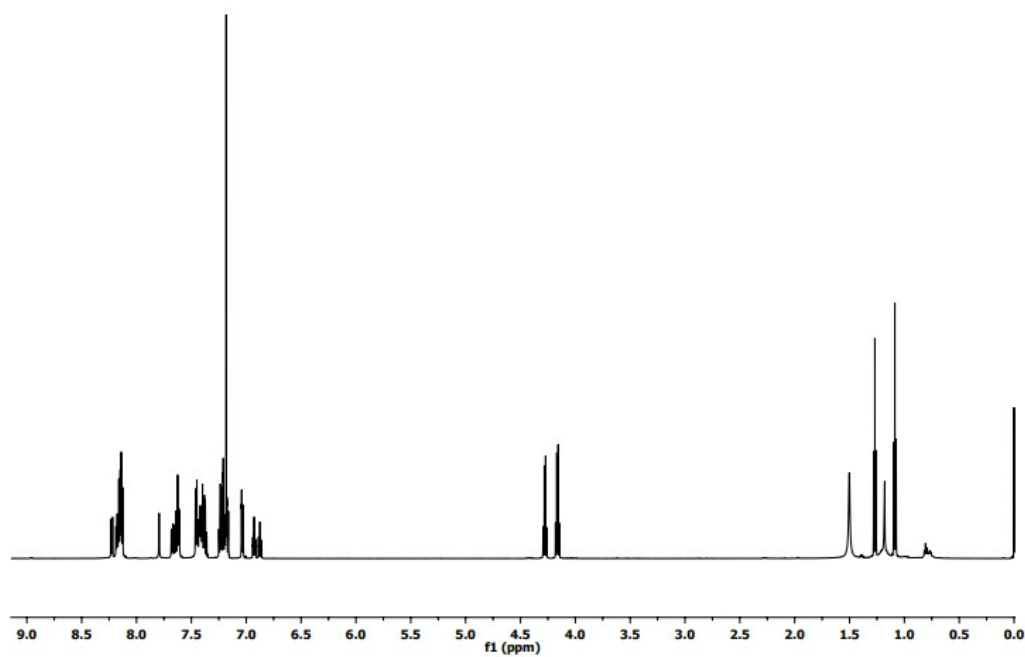

**Fig. S48** <sup>1</sup>H NMR spectrum of PY-PH. (a) before irradiation of light. (b) After irradiation of light.

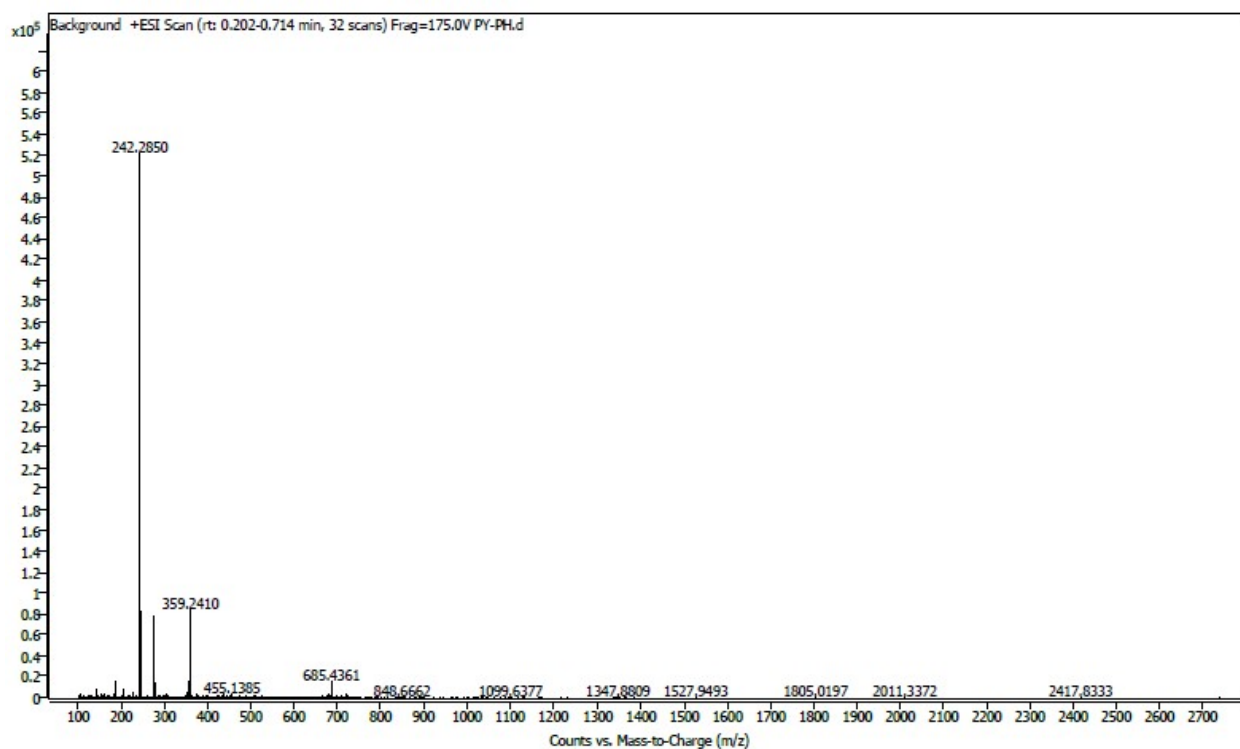

**Fig. S49** Mass spectrum of PY-PH after irradiation of light.

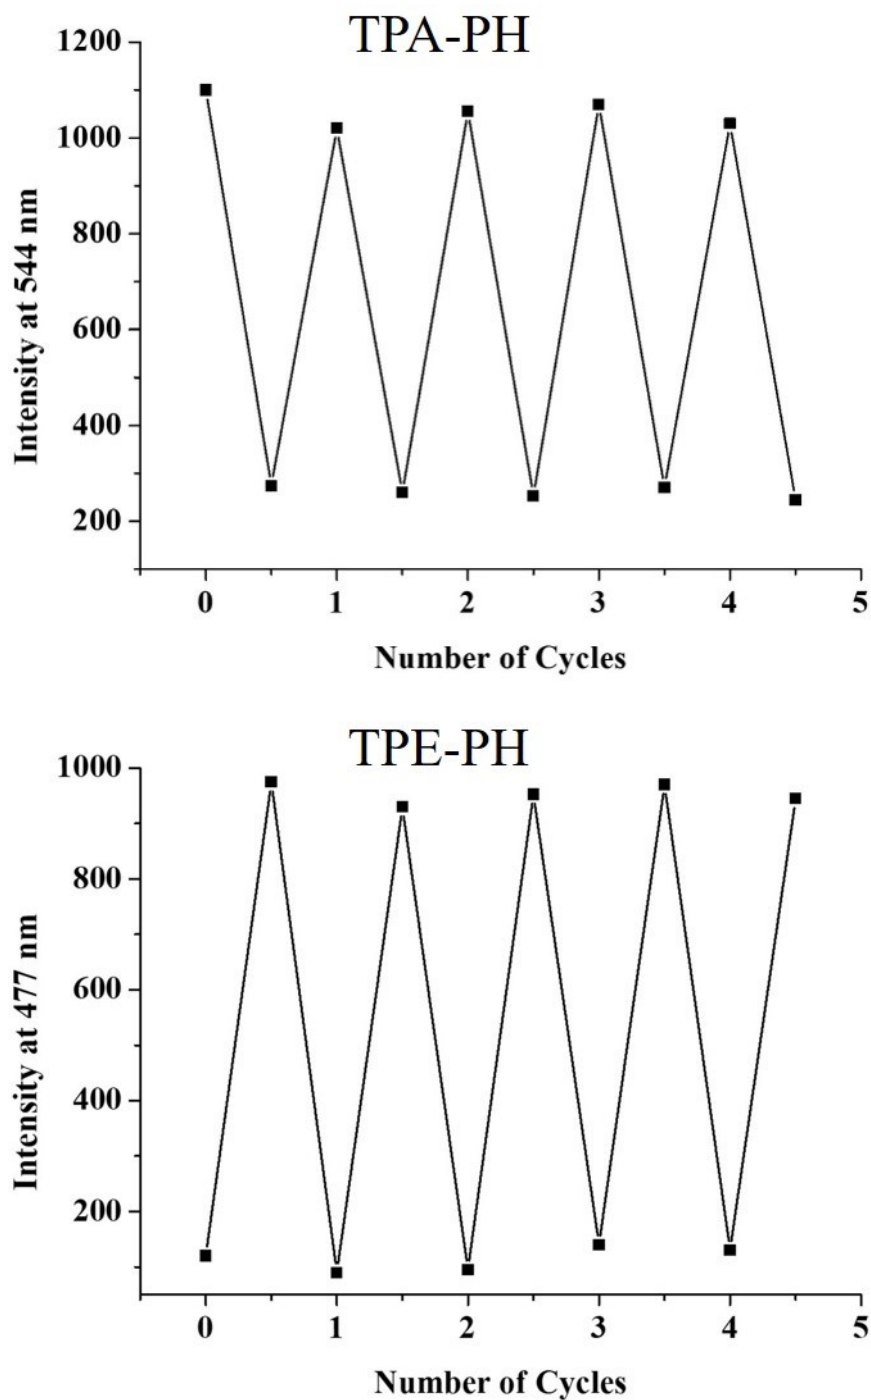

**Fig. S50** Reversible fluorescence photoswitching cycles of TPA-PH and TPE-PH upon alternative irradiation of 365 nm UV and UV light off.



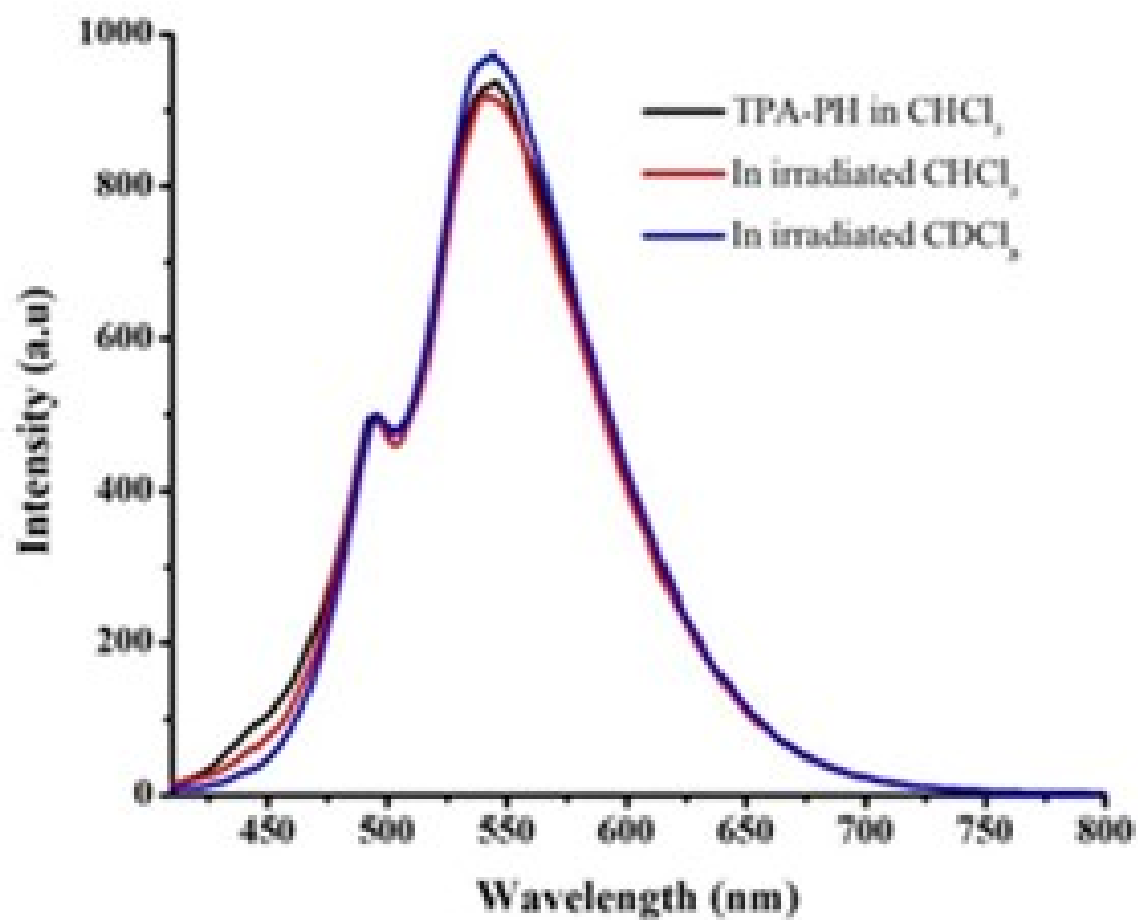

**Fig. S51** Fluorescence spectra of TPA-PH in CHCl<sub>3</sub> (black), in CHCl<sub>3</sub> upon UV irradiation (red) and in CDCl<sub>3</sub> upon UV irradiation (blue)

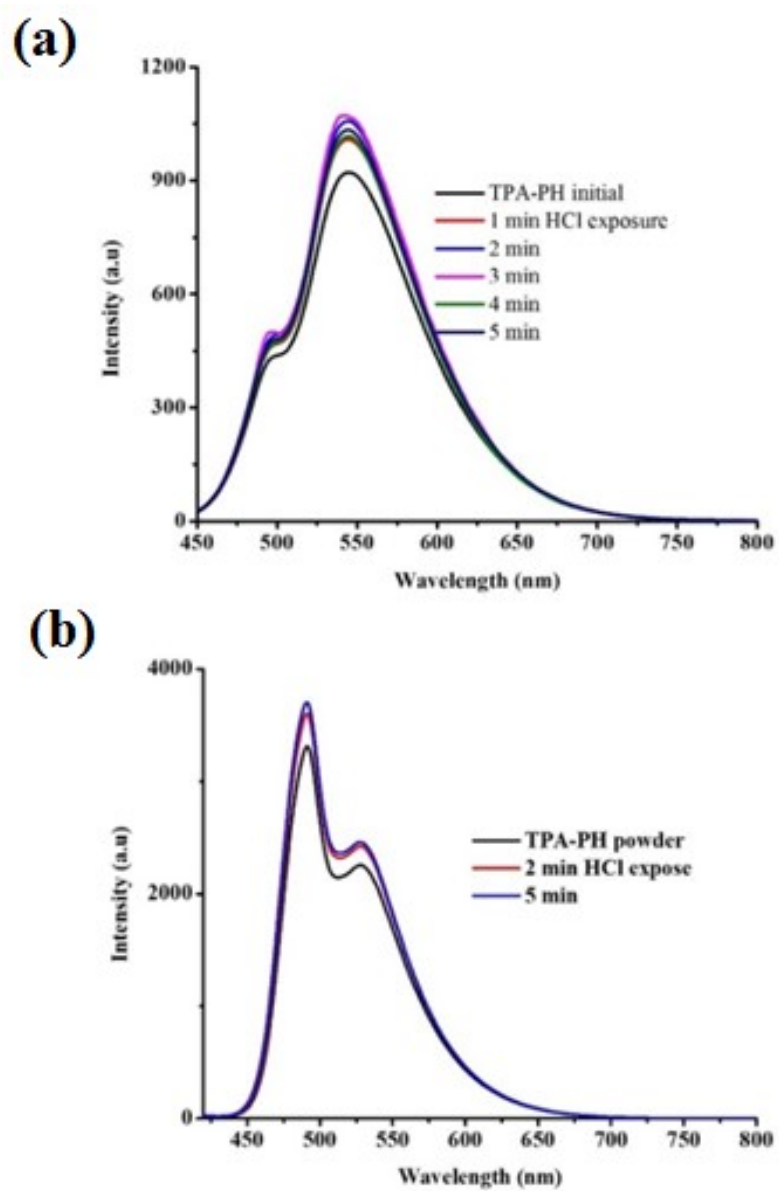

**Fig. S52** Fluorescence switching effect of TPA-PH with HCl fuming, in  $\text{CHCl}_3$  (a) and in solid state (b).
